# Supplementary material for: Isolation and Structure Elucidation of Cembranoids from a Dongsha Atoll Soft Coral Sarcophyton stellatum
Source: PubMed Central journal article supplement (PMC6025080; doi:10.3390/md16060210), 2018-06-14
Supplement: marinedrugs-16-00210-s001.pdf [file marinedrugs-16-00210-s001.pdf]

## SUPPORTING INFORMATION

# Isolation and Structure Elucidation of Cembranoids from a Dongsha Atoll Soft Coral *Sarcophyton stellatum*

**Atallah F. Ahmed**<sup>1,2,†</sup>, **Yi-Wei Chen**<sup>1,†</sup>, **Chiung-Yao Huang**<sup>1,†</sup>, **Yen-Ju Tseng**<sup>1</sup>, **Chi-Chen Lin**<sup>3</sup>, **Chang-Feng Dai**<sup>4</sup>, **Yang-Chang Wu**<sup>5</sup> and **Jyh-Horng Sheu**<sup>1,5,6,7,\*</sup>

<sup>1</sup> Department of Marine Biotechnology and Resources, National Sun Yat-sen University, Kaohsiung 804, Taiwan; afahmed@KSU.EDU.SA (A.F.A.); m985020005@student.nsysu.edu.tw (Y.-W.C.); huangcy@mail.nsysu.edu.tw (C.-Y.H.); d935020003@student.nsysu.edu.tw (Y.-J.T.)

<sup>2</sup> Department of Pharmacognosy, College of Pharmacy, King Saud University, Riyadh 11451, Saudi Arabia

<sup>3</sup> Institute of Biomedical Sciences, National Chung Hsing University, Taichung 402, Taiwan; lincc@dragon.nchu.edu.tw

<sup>4</sup> Institute of Oceanography, National Taiwan University, Taipei 112, Taiwan; corallab@ntu.edu.tw

<sup>5</sup> Graduate Institute of Natural Products, Kaohsiung Medical University, Kaohsiung 807, Taiwan; yachwu@kmu.edu.tw

<sup>6</sup> Frontier Center for Ocean Science and Technology, National Sun Yat-sen University, Kaohsiung 804, Taiwan

<sup>7</sup> Department of Medical Research, China Medical University Hospital, China Medical University, Taichung 404, Taiwan

\* Correspondence: sheu@mail.nsysu.edu.tw; Tel.: +886-7-525-2000 (ext. 5030); Fax: +886-7-525-5020.

<sup>†</sup> These authors contributed equally to this work.

Corresponding author: E-mail: sheu@mail.nsysu.edu.tw; Fax: +886-7-525-5020; Tel: +886-7-525-2000 ext. 5030

## List of Supplementary material:

| No         | Content                                                            | page | No         | Content                                                     | page |
|------------|--------------------------------------------------------------------|------|------------|-------------------------------------------------------------|------|
| Figure S1  | $^1\text{H}$ NMR spectrum of <b>1</b> in $\text{CDCl}_3$           | 3    | Figure S25 | COSY spectrum of <b>3</b> in $\text{CDCl}_3$                | 27   |
| Figure S2  | $^{13}\text{C}$ NMR spectrum of <b>1</b> in $\text{CDCl}_3$        | 4    | Figure S26 | HMBC spectrum of <b>3</b> in $\text{CDCl}_3$                | 28   |
| Figure S3  | DEPT spectra of <b>1</b> in $\text{CDCl}_3$                        | 5    | Figure S27 | NOESY spectrum of <b>3</b> in $\text{CDCl}_3$               | 29   |
| Figure S4  | HMQC spectrum of <b>1</b> in $\text{CDCl}_3$                       | 6    | Figure S28 | $^1\text{H}$ NMR spectrum of <b>4</b> in $\text{CDCl}_3$    | 30   |
| Figure S5  | COSY spectrum of <b>1</b> in $\text{CDCl}_3$                       | 7    | Figure S29 | $^{13}\text{C}$ NMR spectrum of <b>4</b> in $\text{CDCl}_3$ | 31   |
| Figure S6  | HMBC spectrum of <b>1</b> in $\text{CDCl}_3$                       | 8    | Figure S30 | DEPT spectra of <b>4</b> in $\text{CDCl}_3$                 | 32   |
| Figure S7  | NOESY spectrum of <b>1</b> in $\text{CDCl}_3$                      | 9    | Figure S31 | HMQC spectrum of <b>4</b> in $\text{CDCl}_3$                | 33   |
| Figure S8  | $^1\text{H}$ NMR spectrum of <b>1</b> in $\text{C}_6\text{D}_6$    | 10   | Figure S32 | COSY spectrum of <b>4</b> in $\text{CDCl}_3$                | 34   |
| Figure S9  | $^{13}\text{C}$ NMR spectrum of <b>1</b> in $\text{C}_6\text{D}_6$ | 11   | Figure S33 | HMBC spectrum of <b>4</b> in $\text{CDCl}_3$                | 35   |
| Figure S10 | DEPT spectrum of <b>1</b> in $\text{C}_6\text{D}_6$                | 12   | Figure S34 | NOESY spectrum of <b>4</b> in $\text{CDCl}_3$               | 36   |
| Figure S11 | COSY spectrum of <b>1</b> in $\text{C}_6\text{D}_6$                | 13   | Figure S35 | $^1\text{H}$ NMR spectrum of <b>5</b> in $\text{CDCl}_3$    | 37   |
| Figure S12 | HMBC spectrum of <b>1</b> in $\text{C}_6\text{D}_6$                | 14   | Figure S36 | $^{13}\text{C}$ NMR spectrum of <b>5</b> in $\text{CDCl}_3$ | 38   |
| Figure S13 | NOESY spectrum of <b>1</b> in $\text{C}_6\text{D}_6$               | 15   | Figure S37 | DEPT spectra of <b>5</b> in $\text{CDCl}_3$                 | 39   |
| Figure S14 | $^1\text{H}$ NMR spectrum of <b>2</b> in $\text{CDCl}_3$           | 16   | Figure S38 | HMQC spectrum of <b>5</b> in $\text{CDCl}_3$                | 40   |
| Figure S15 | $^{13}\text{C}$ NMR spectrum of <b>2</b> in $\text{CDCl}_3$        | 17   | Figure S39 | COSY spectrum of <b>5</b> in $\text{CDCl}_3$                | 41   |
| Figure S16 | DEPT spectra of <b>2</b> in $\text{CDCl}_3$                        | 18   | Figure S40 | HMBC spectrum of <b>5</b> in $\text{CDCl}_3$                | 42   |
| Figure S17 | HMQC spectrum of <b>2</b> in $\text{CDCl}_3$                       | 19   | Figure S41 | NOESY spectrum of <b>5</b> in $\text{CDCl}_3$               | 43   |
| Figure S18 | COSY spectrum of <b>2</b> in $\text{CDCl}_3$                       | 20   | Figure S42 | $^1\text{H}$ NMR spectrum of <b>6</b> in $\text{CDCl}_3$    | 44   |
| Figure S19 | HMBC spectrum of <b>2</b> in $\text{CDCl}_3$                       | 21   | Figure S43 | $^{13}\text{C}$ NMR spectrum of <b>6</b> in $\text{CDCl}_3$ | 45   |
| Figure S20 | NOESY spectrum of <b>2</b> in $\text{CDCl}_3$                      | 22   | Figure S44 | HMQC spectrum of <b>6</b> in $\text{CDCl}_3$                | 46   |
| Figure S21 | $^1\text{H}$ NMR spectrum of <b>3</b> in $\text{CDCl}_3$           | 23   | Figure S45 | COSY spectrum of <b>6</b> in $\text{CDCl}_3$                | 47   |
| Figure S22 | $^{13}\text{C}$ NMR spectrum of <b>3</b> in $\text{CDCl}_3$        | 24   | Figure S46 | HMBC spectrum of <b>6</b> in $\text{CDCl}_3$                | 48   |
| Figure S23 | DEPT spectra of <b>3</b> in $\text{CDCl}_3$                        | 25   | Figure S47 | NOESY spectrum of <b>6</b> in $\text{CDCl}_3$               | 49   |
| Figure S24 | HMQC spectrum of <b>3</b> in $\text{CDCl}_3$                       | 26   |            |                                                             |      |

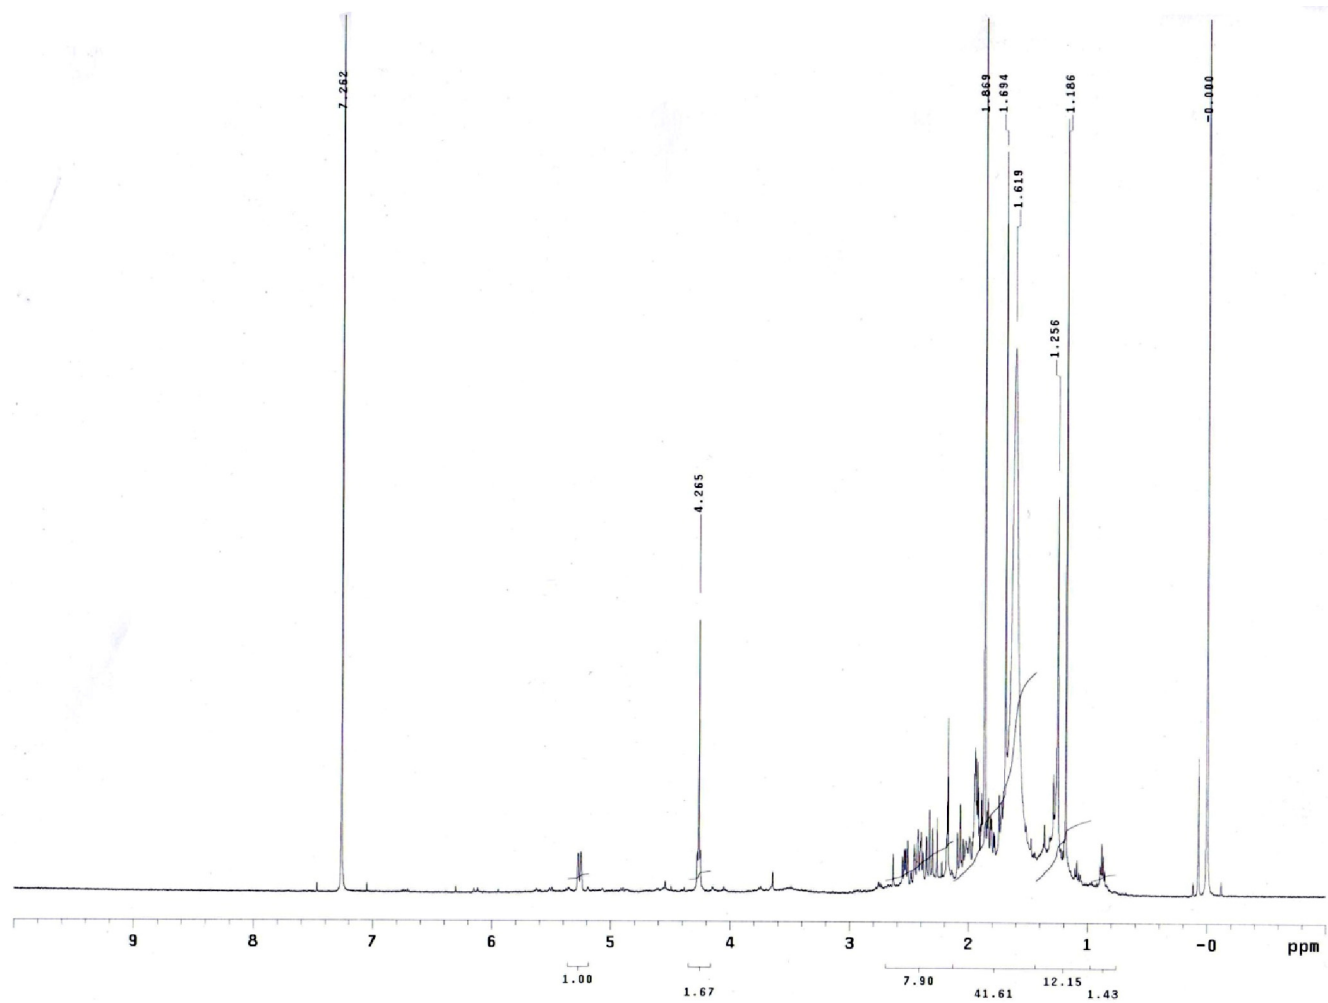

Figure S1. <sup>1</sup>H NMR spectrum of 1 in CDCl<sub>3</sub>

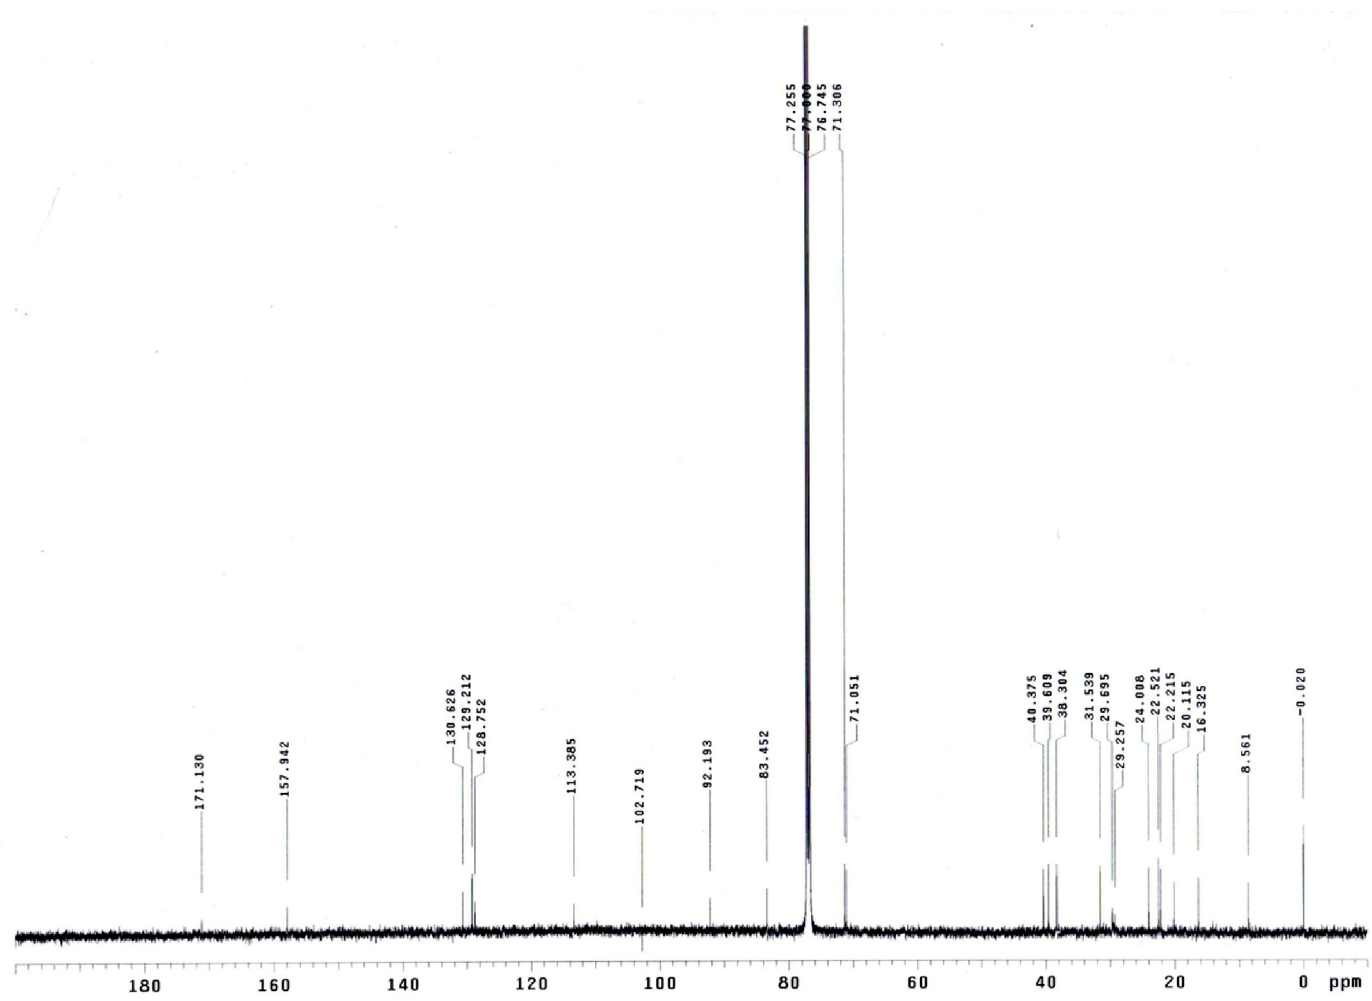

Figure S2.  $^{13}\text{C}$  NMR spectrum of 1 in  $\text{CDCl}_3$

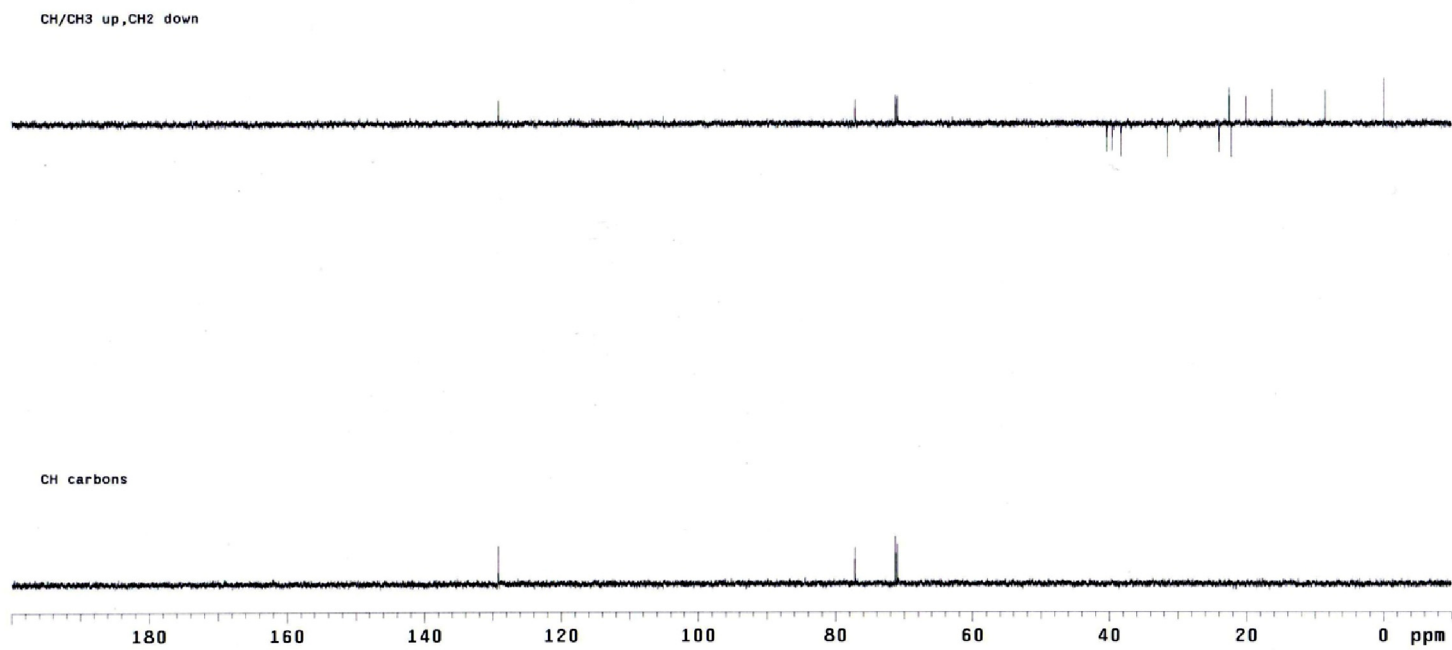

**Figure S3.** DEPT spectra of **1** in CDCl<sub>3</sub>

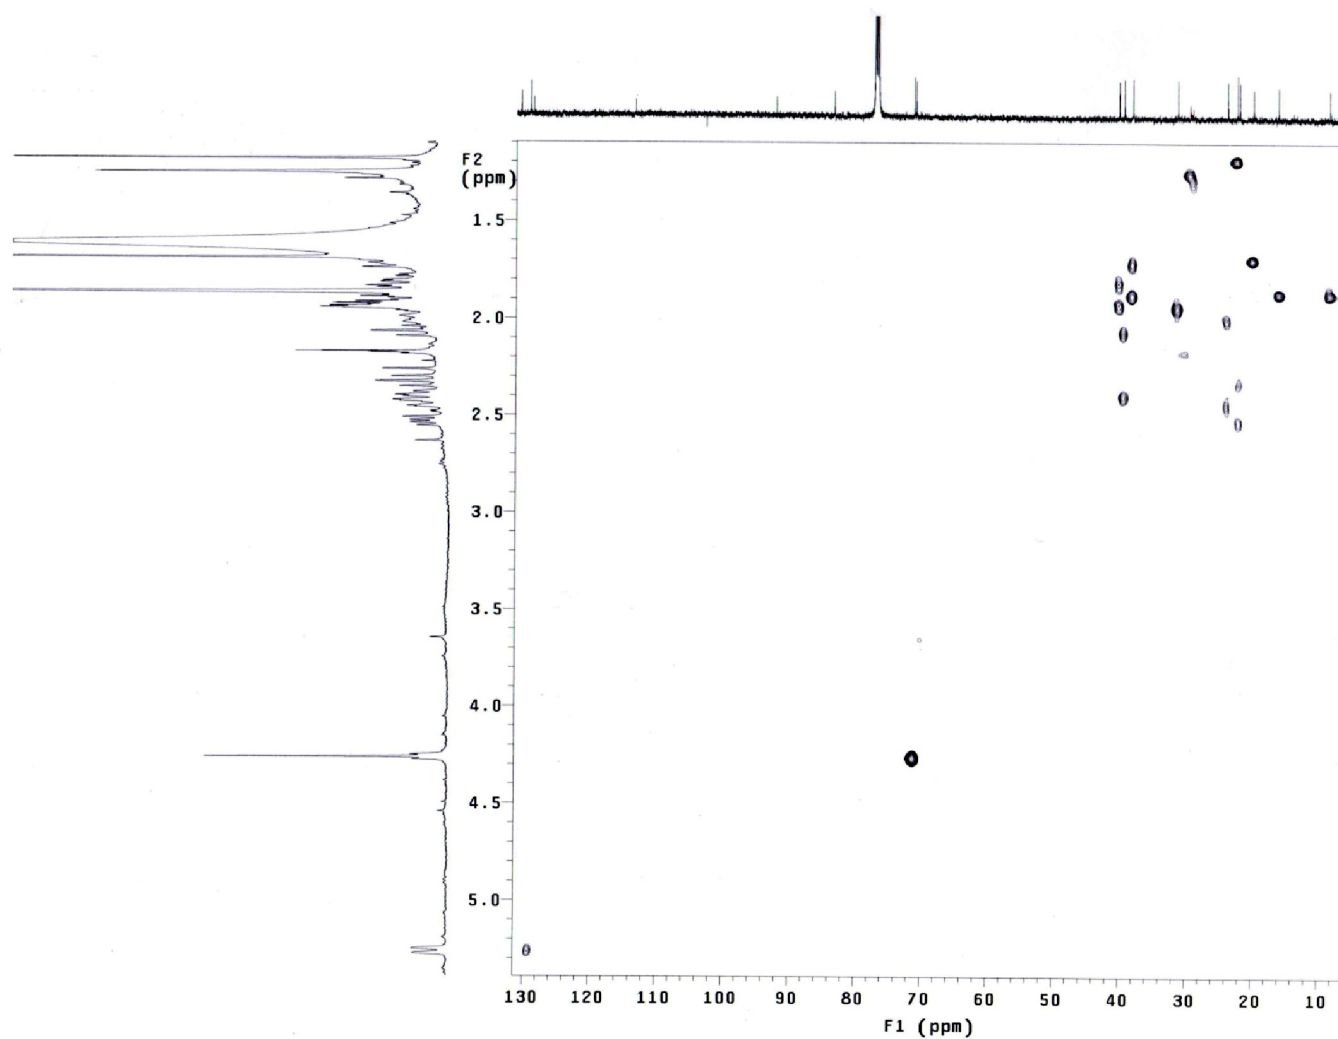

**Figure S4.** HMQC spectrum of **1** in CDCl<sub>3</sub>

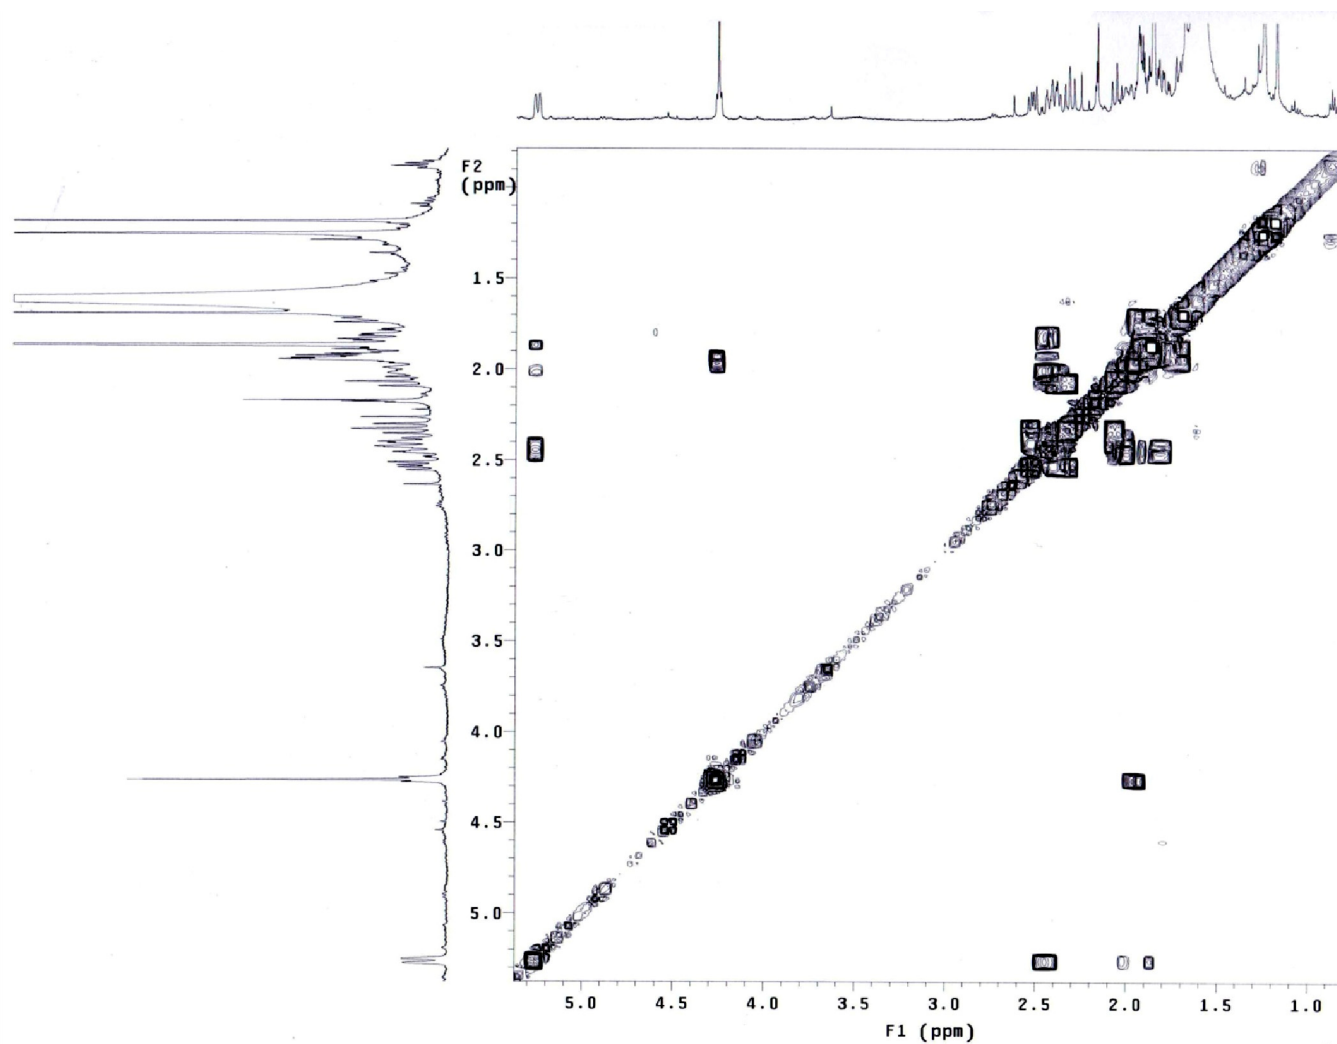

Figure S5. COSY spectrum of **1** in CDCl<sub>3</sub>

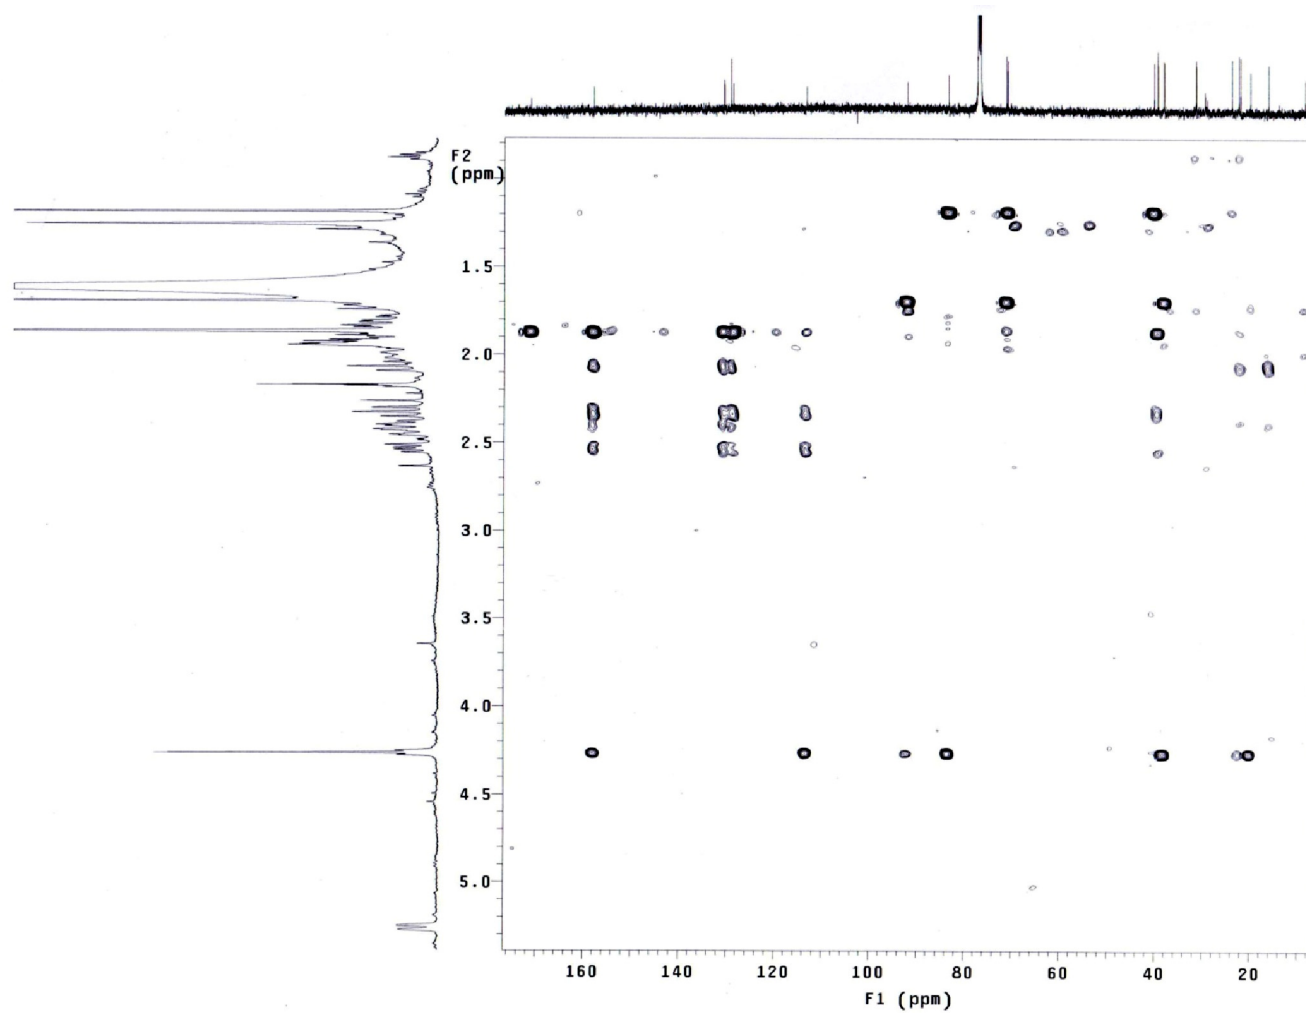

**Figure S6.** HMBC spectrum of **1** in CDCl<sub>3</sub>



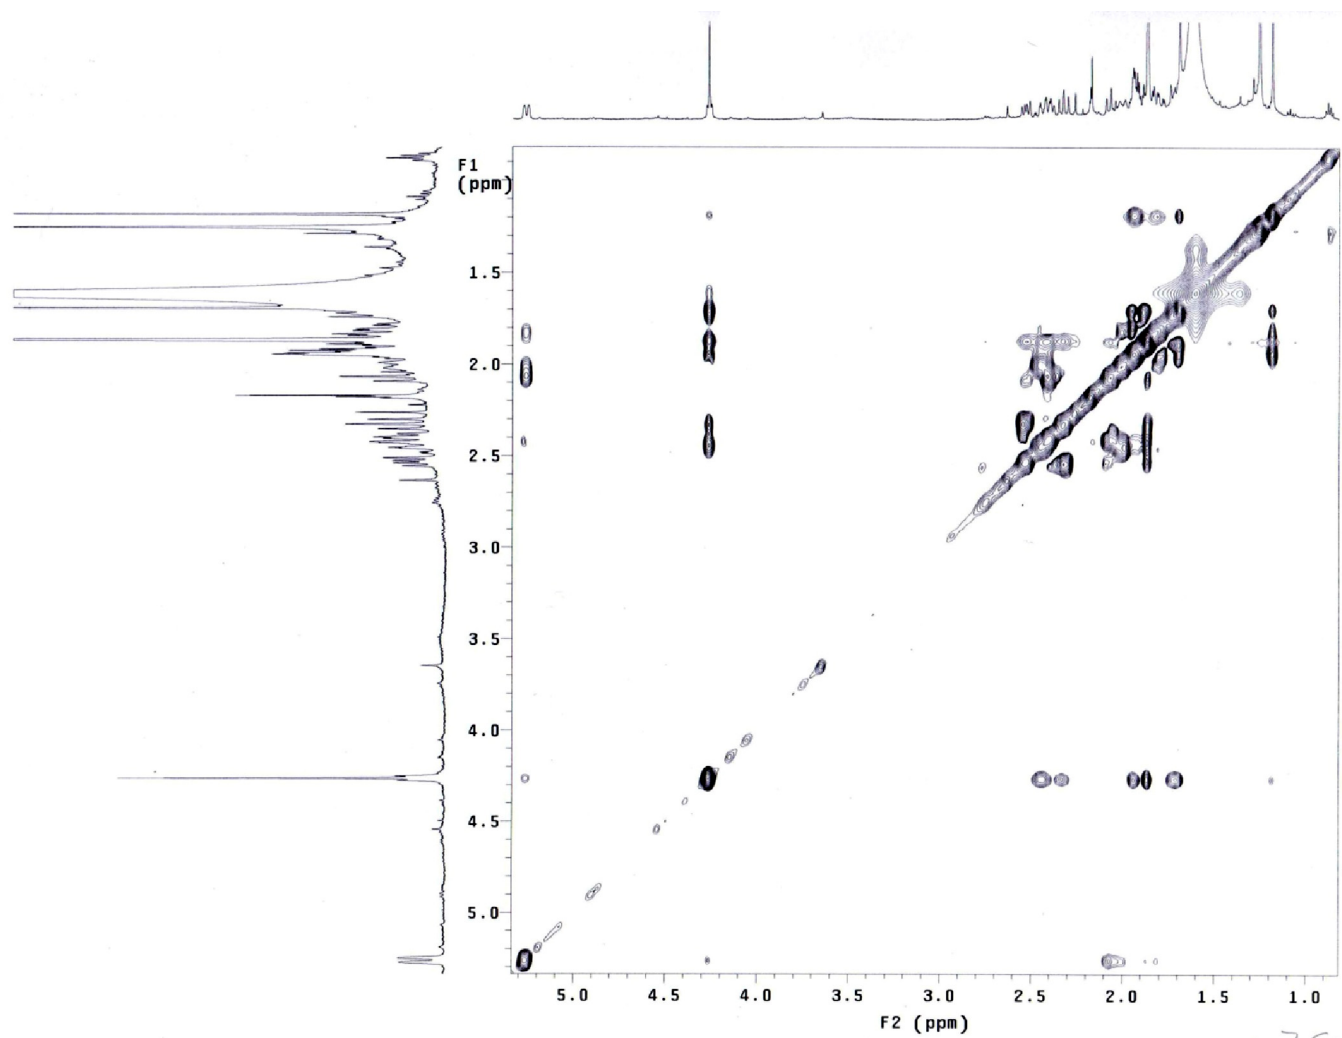

**Figure S7.** NOESY spectrum of **1** in CDCl<sub>3</sub>

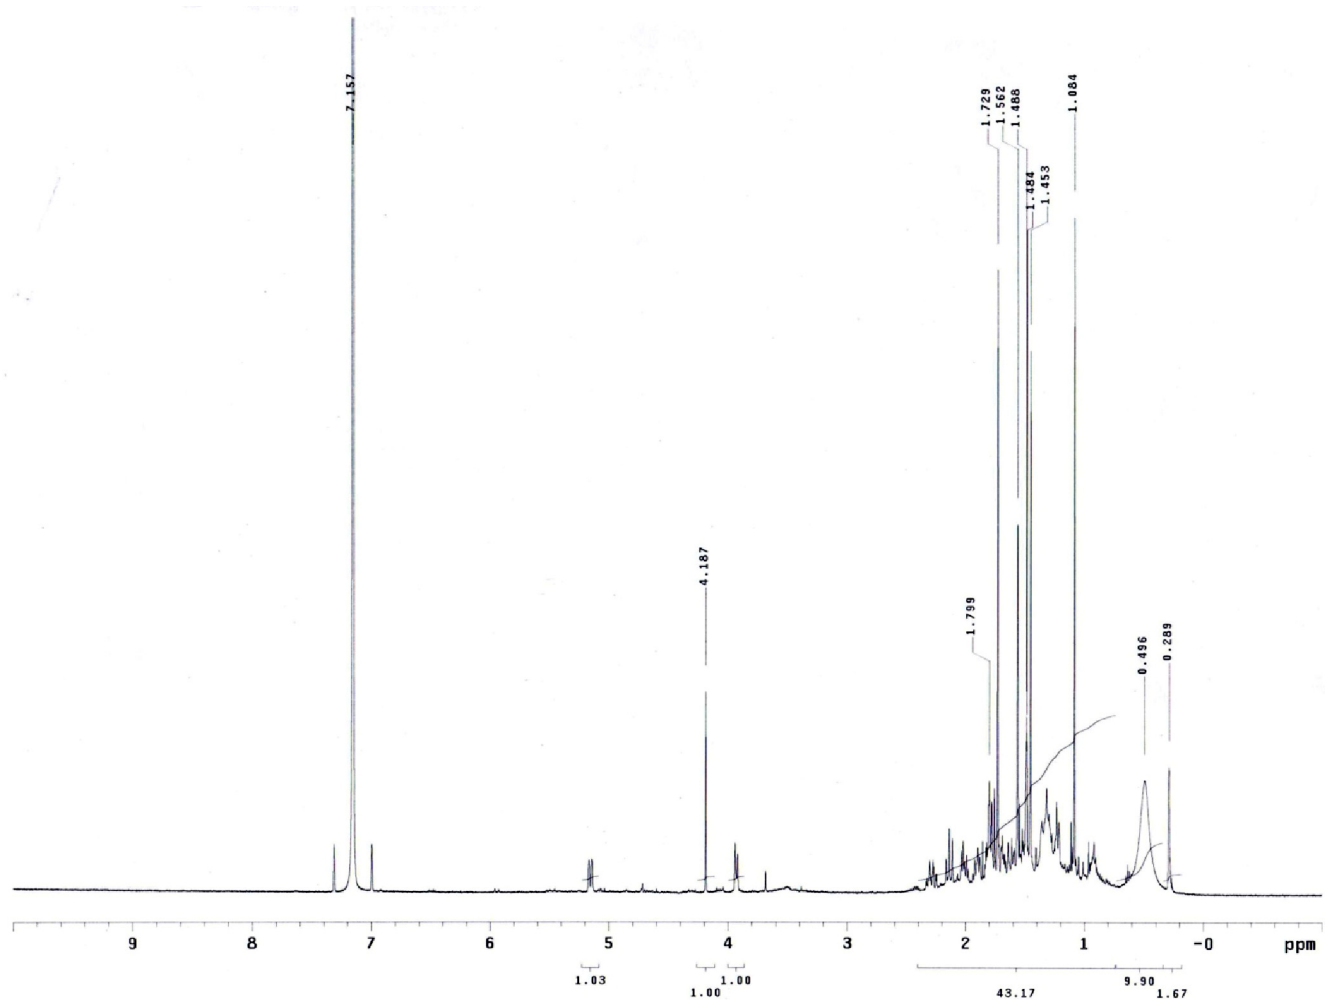

**Figure S8.**  $^1\text{H}$  NMR spectrum of **1** in  $\text{C}_6\text{D}_6$

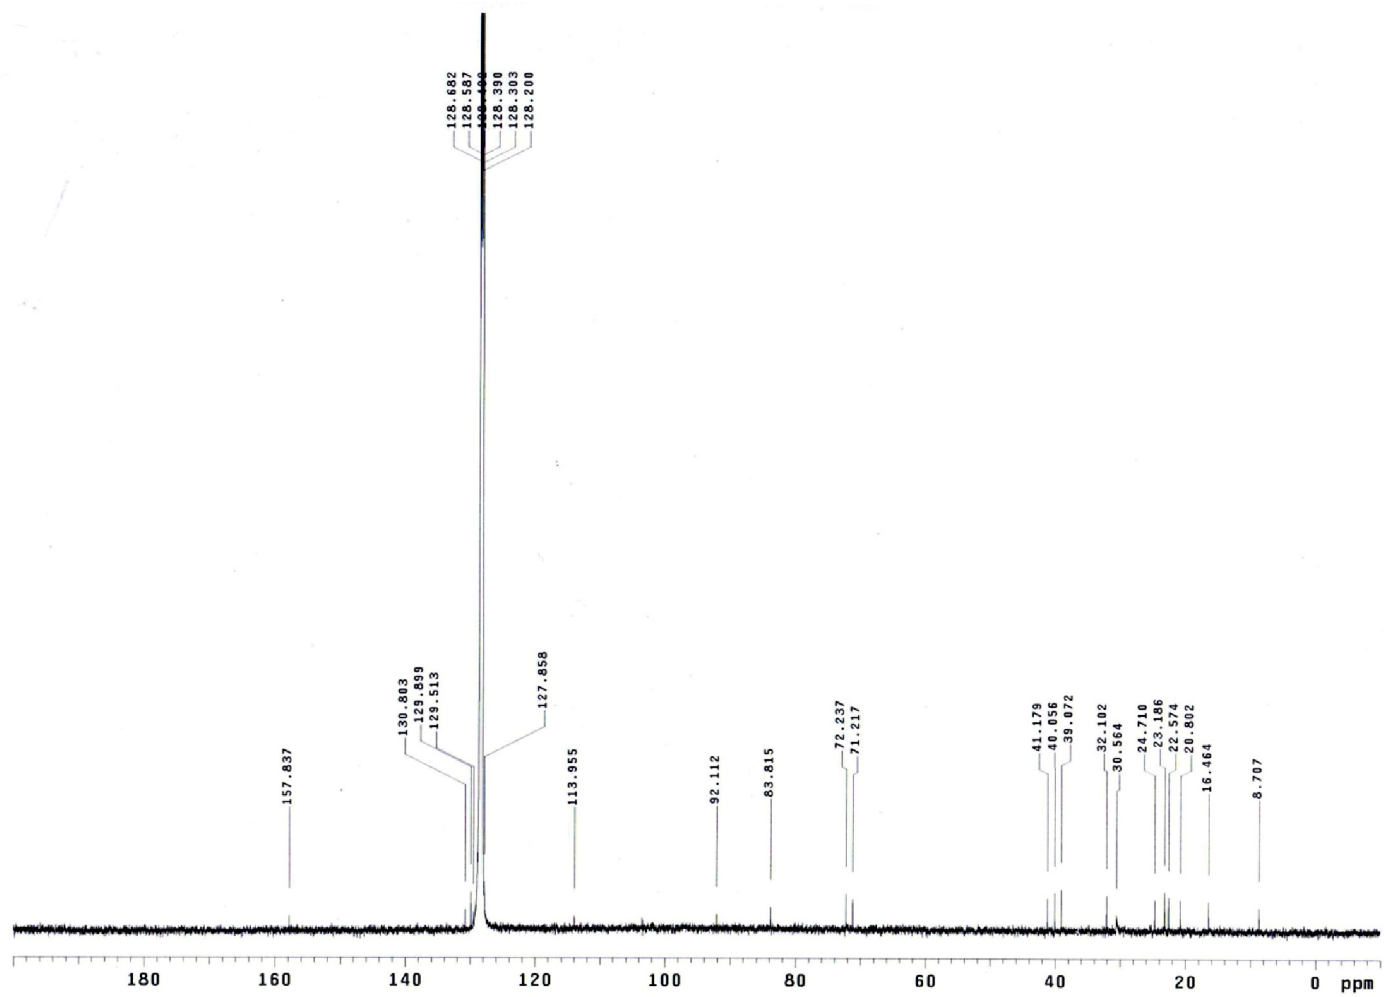

Figure S9.  $^{13}\text{C}$  NMR spectrum of 1 in  $\text{C}_6\text{D}_6$

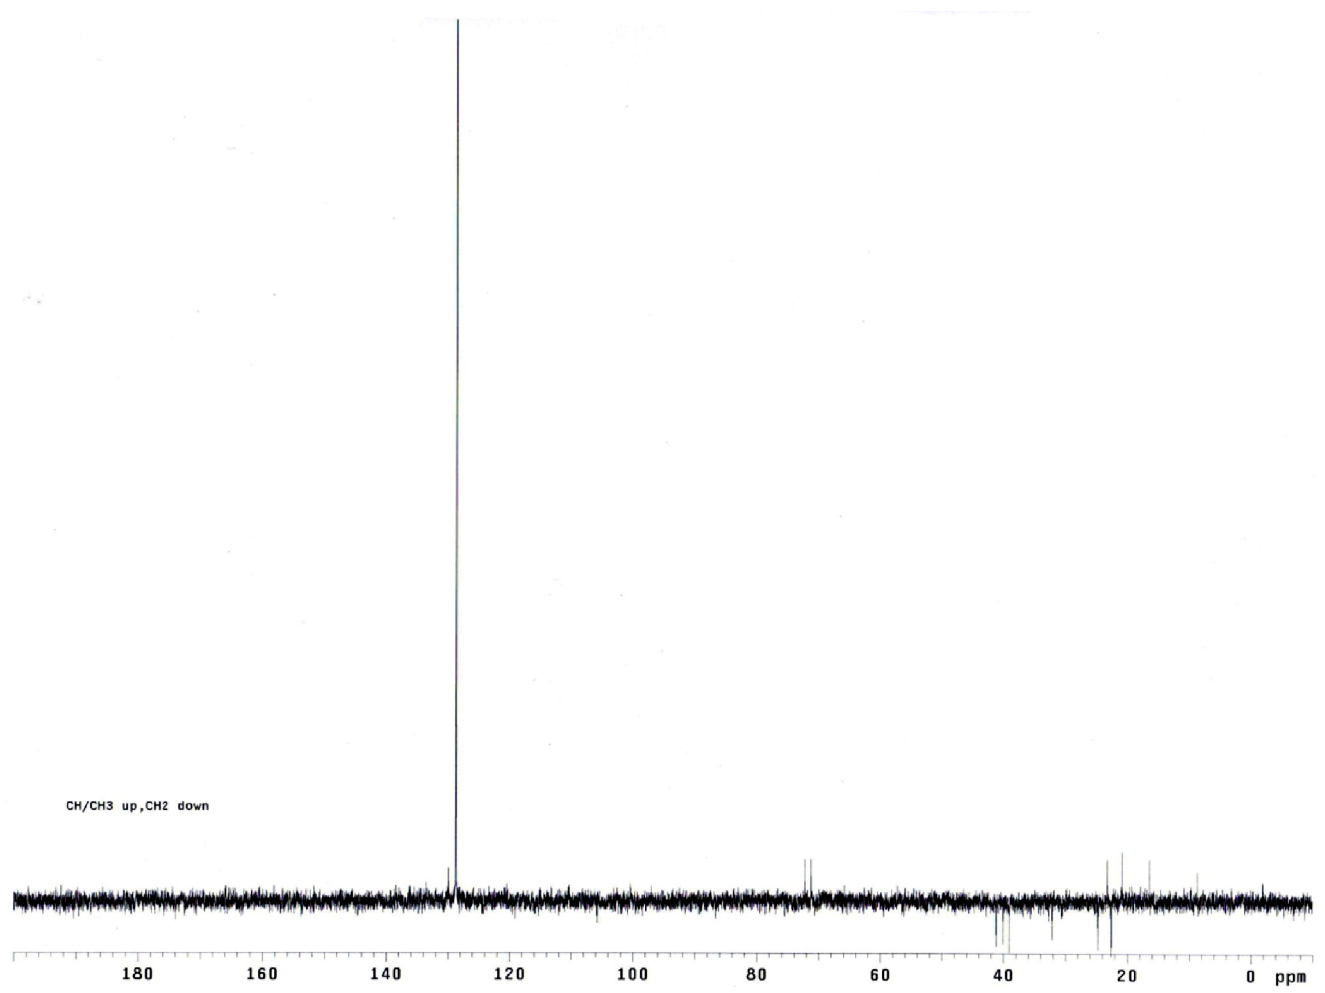

Figure S10. DEPT spectrum of **1** in C<sub>6</sub>D<sub>6</sub>

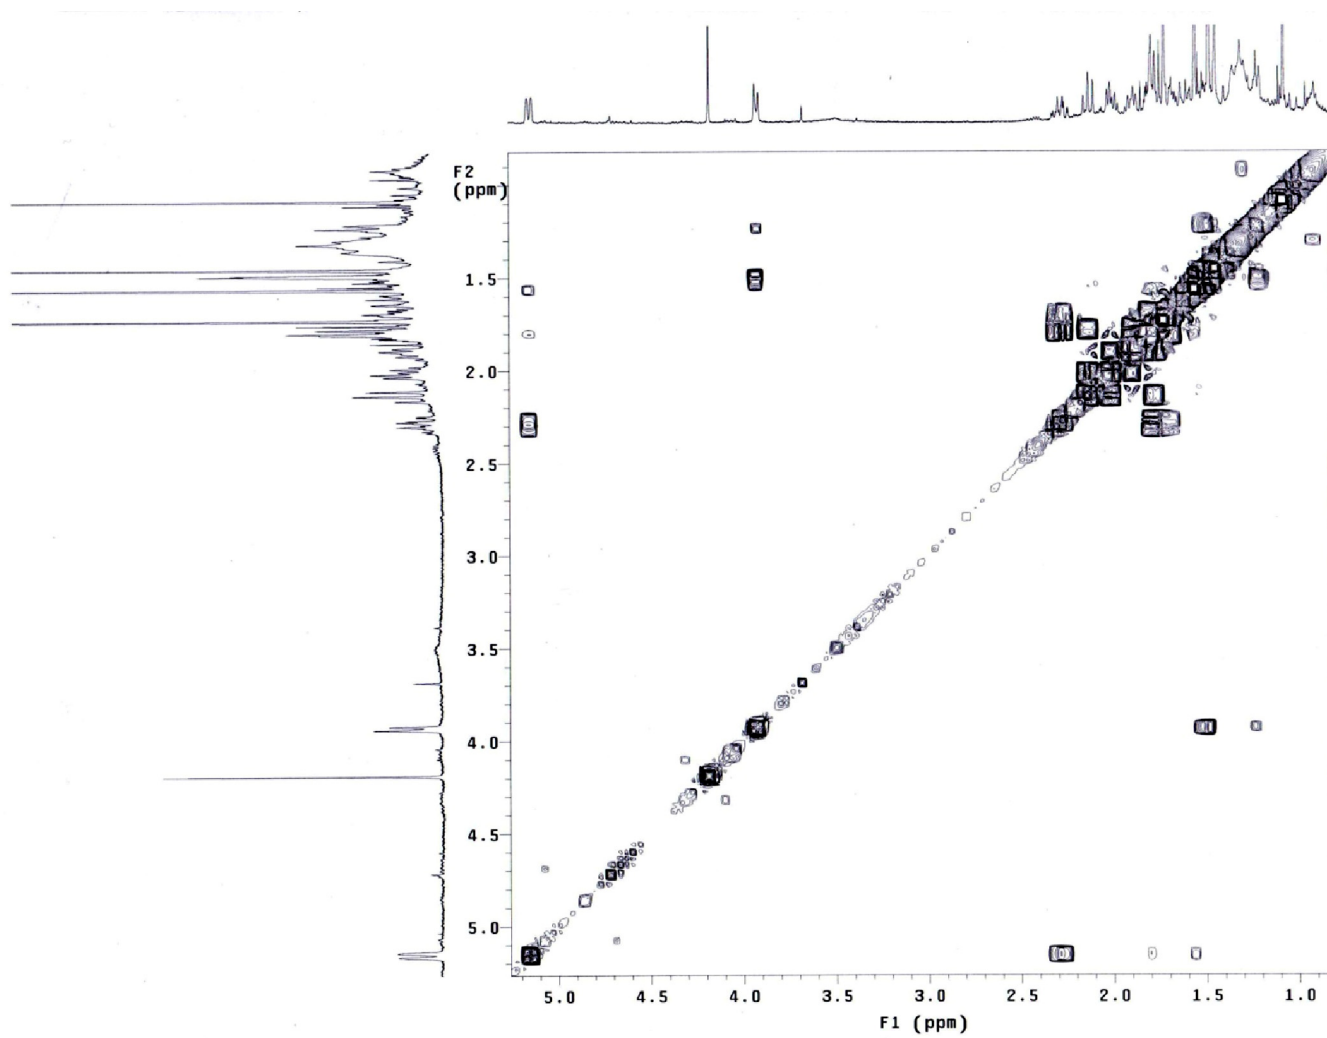

**Figure S11.** COSY spectrum of **1** in C<sub>6</sub>D<sub>6</sub>

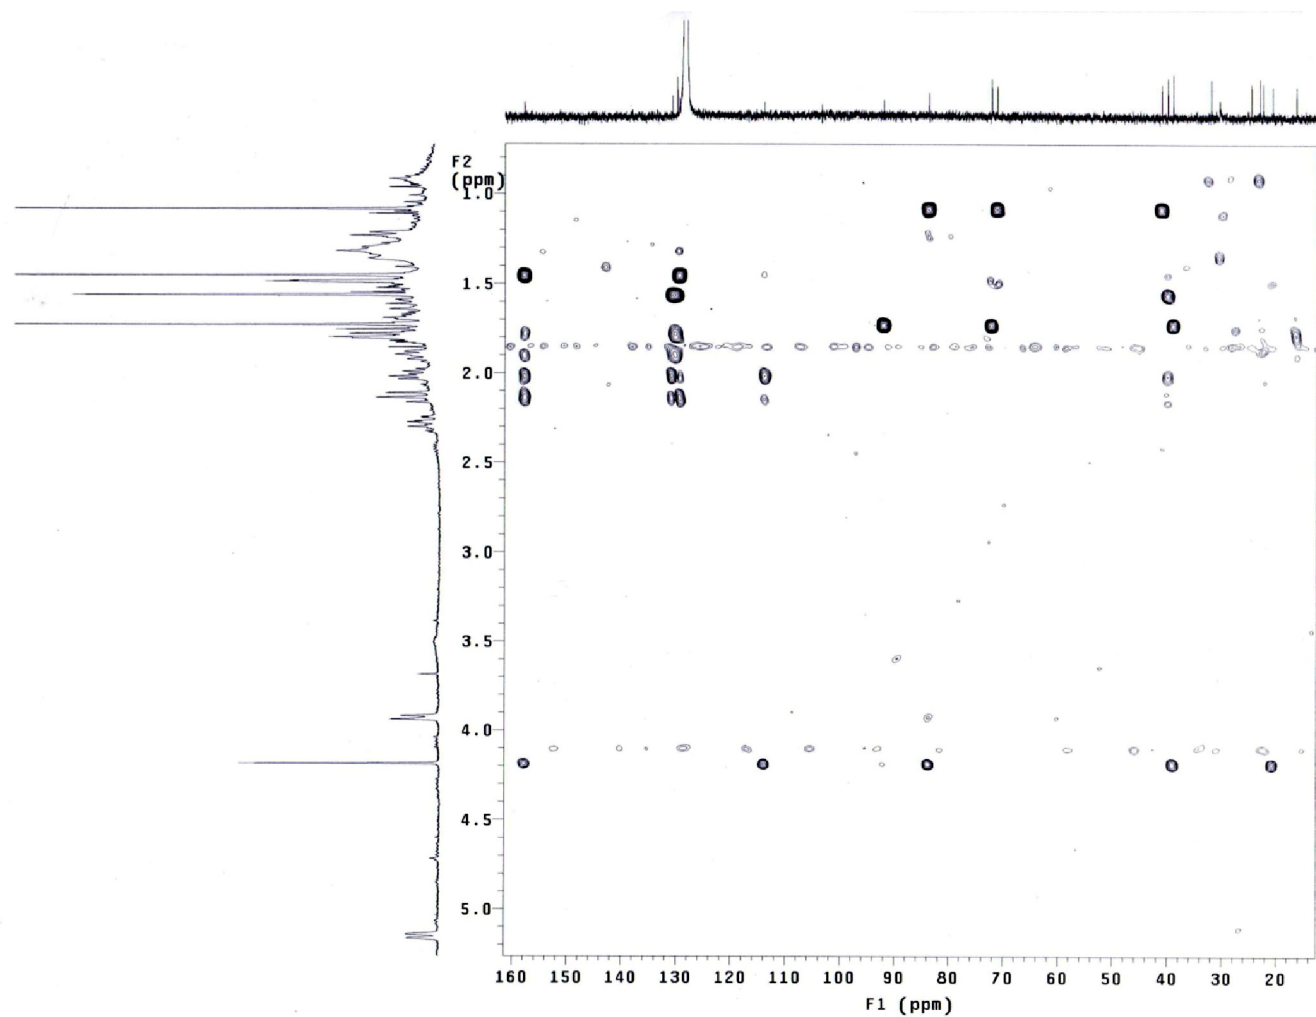

**Figure S12.** HMBC spectrum of **1** in  $\text{C}_6\text{D}_6$

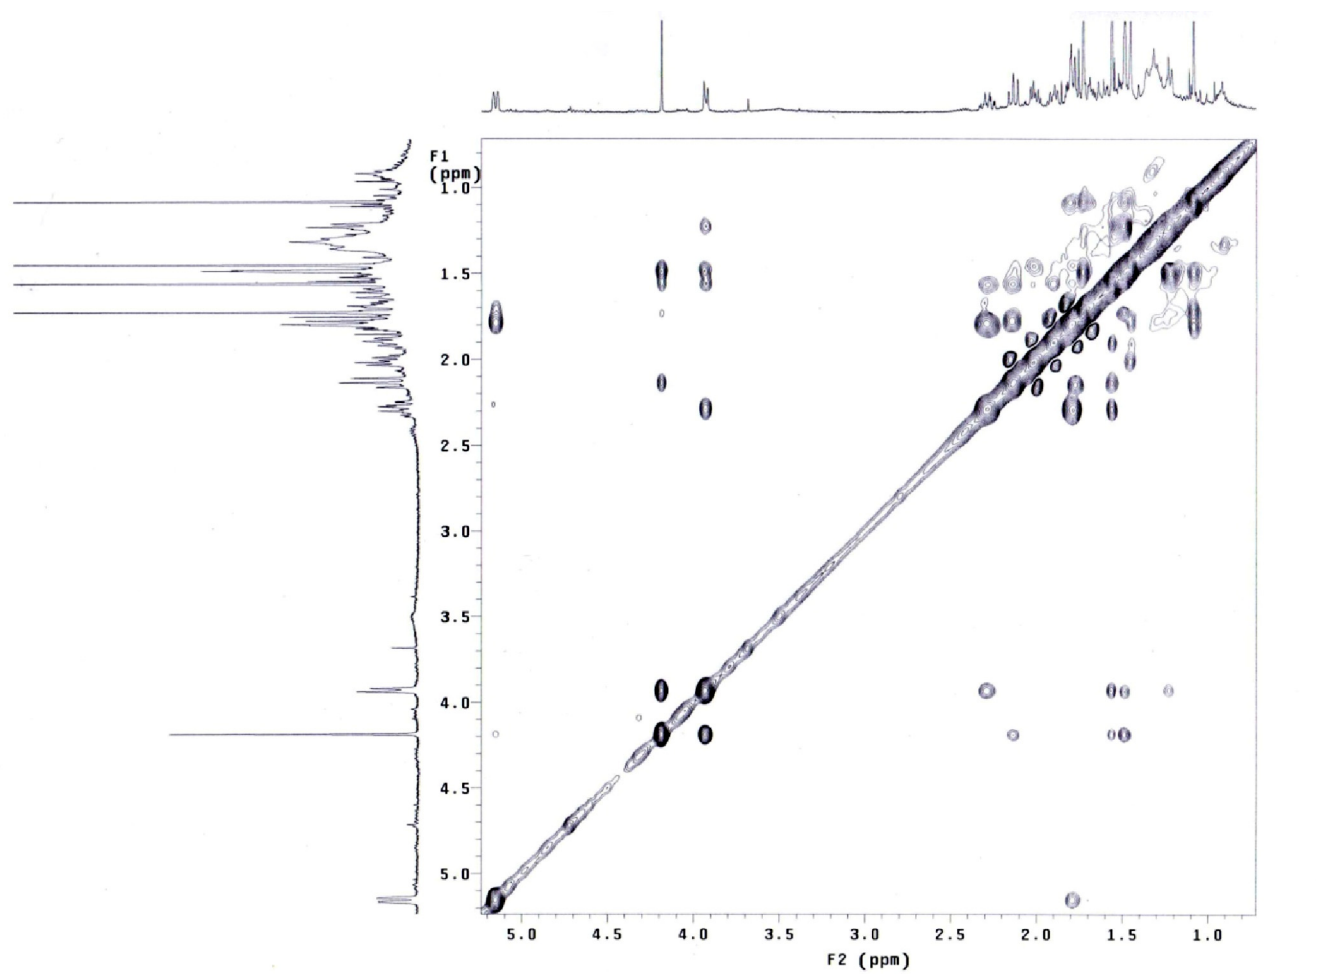

**Figure S13.** NOESY spectrum of **1** in  $C_6D_6$

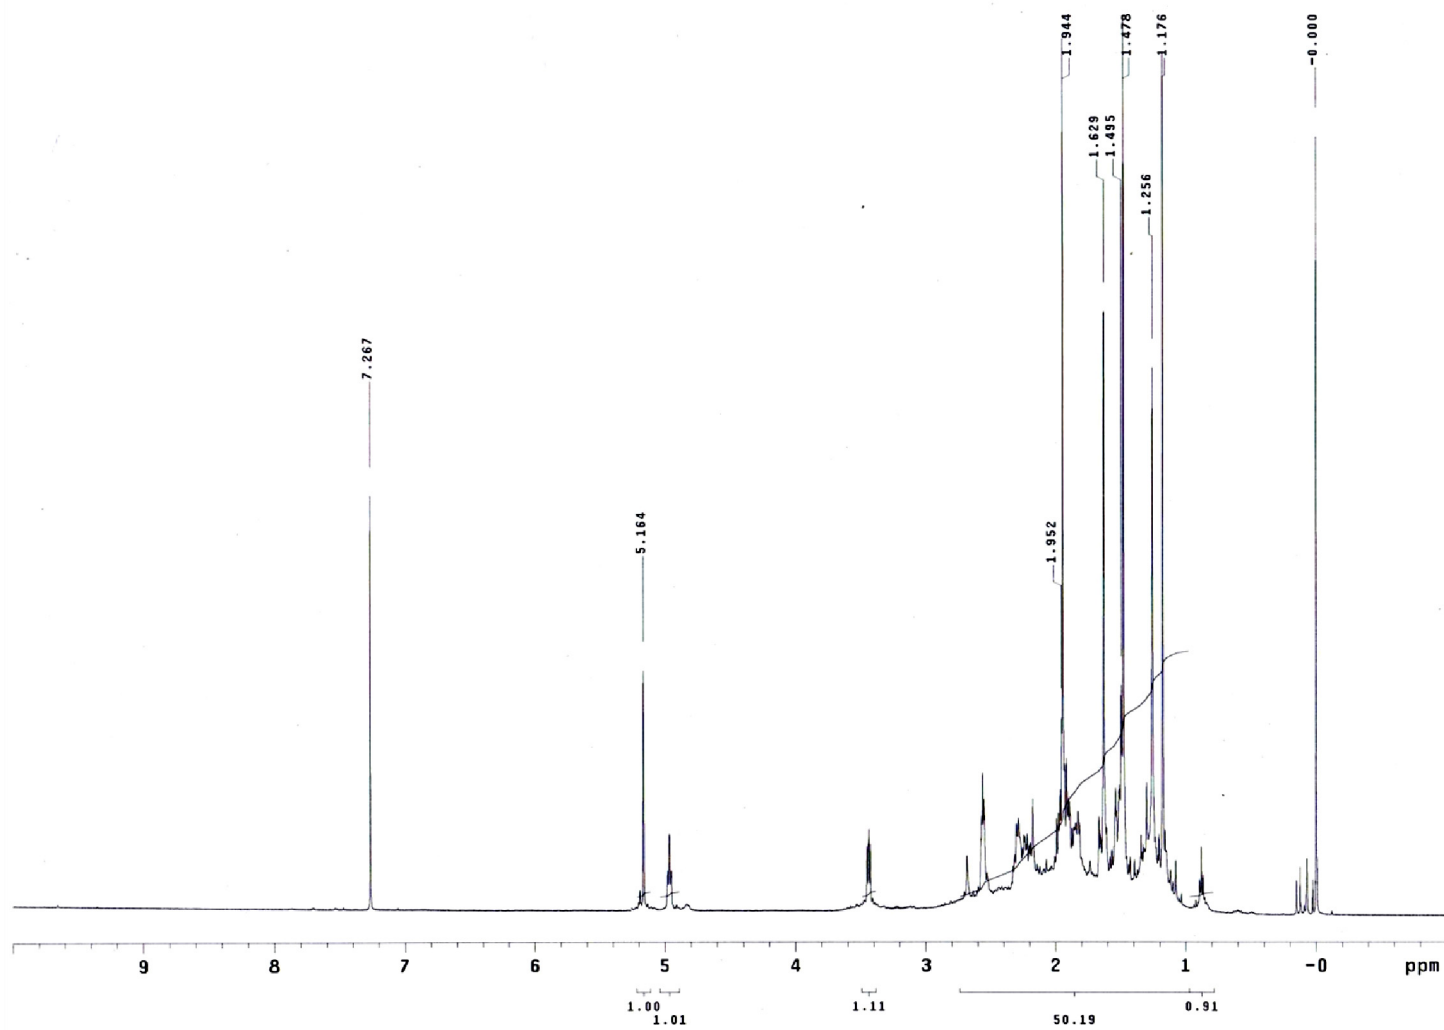

**Figure S14.** <sup>1</sup>H NMR spectrum of **2** in CDCl<sub>3</sub>



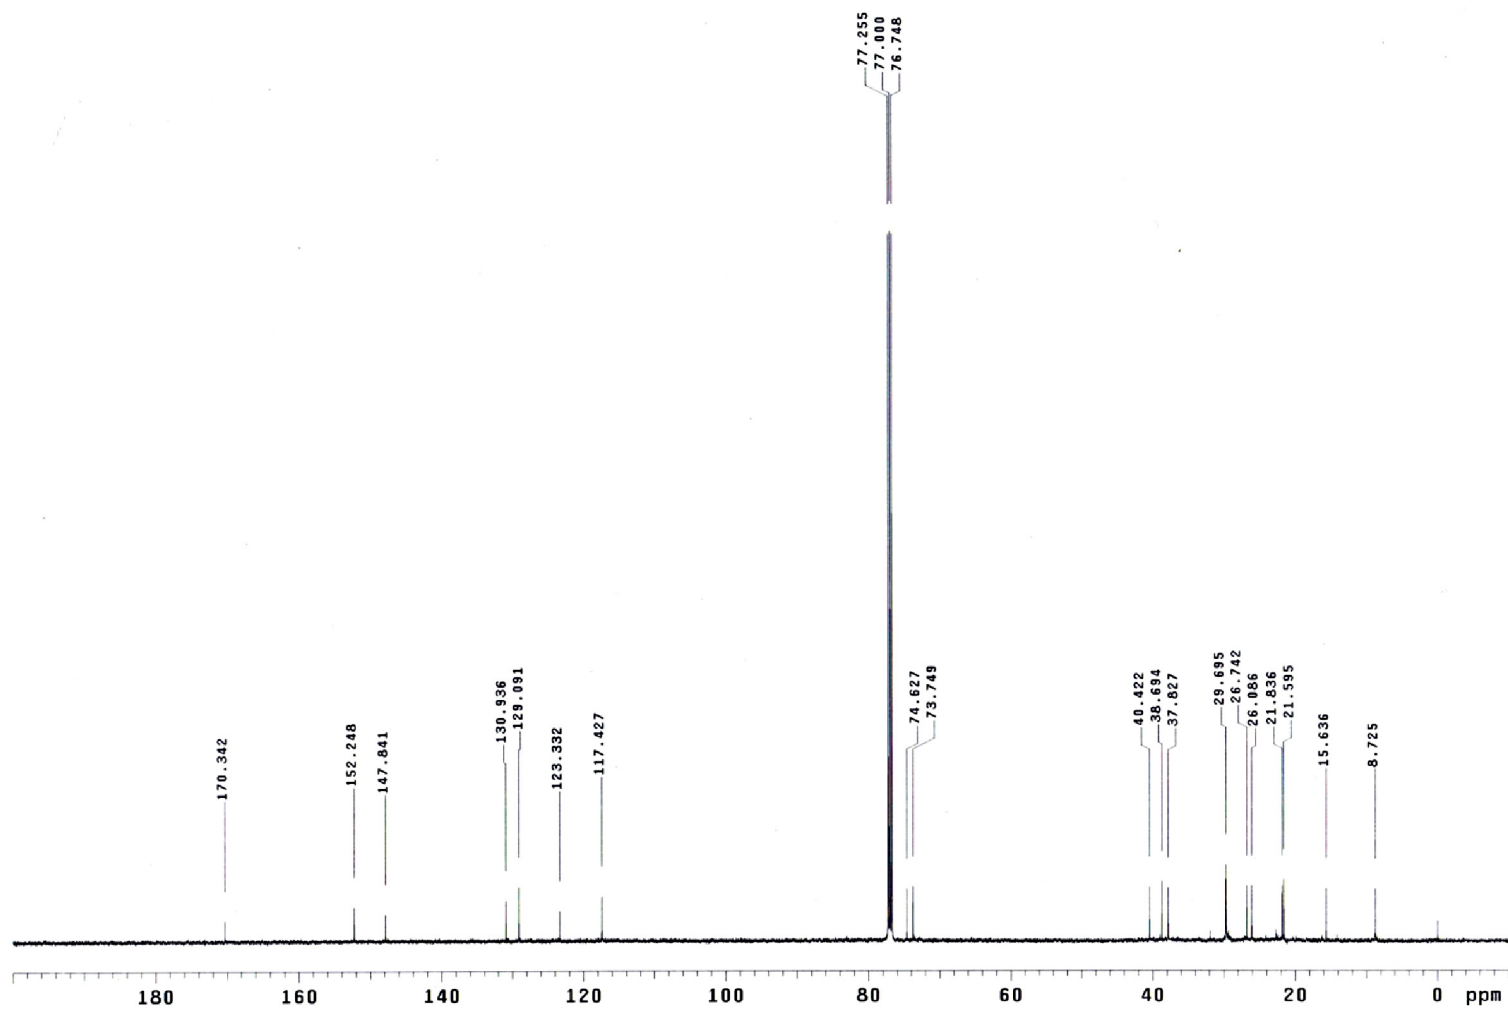

Figure S15.  $^{13}\text{C}$  NMR spectrum of **2** in  $\text{CDCl}_3$

CH/CH3 up, CH2 down

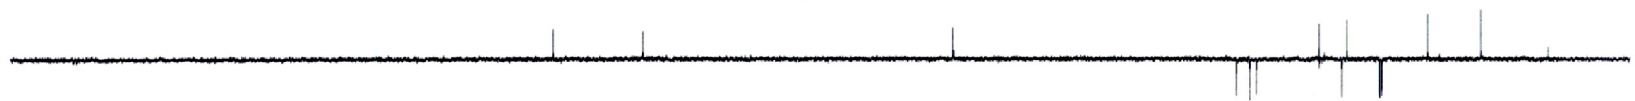

CH carbons

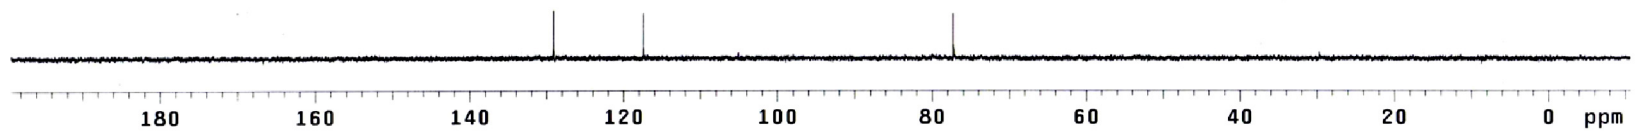

Figure S16. DEPT spectra of **2** in  $\text{CDCl}_3$

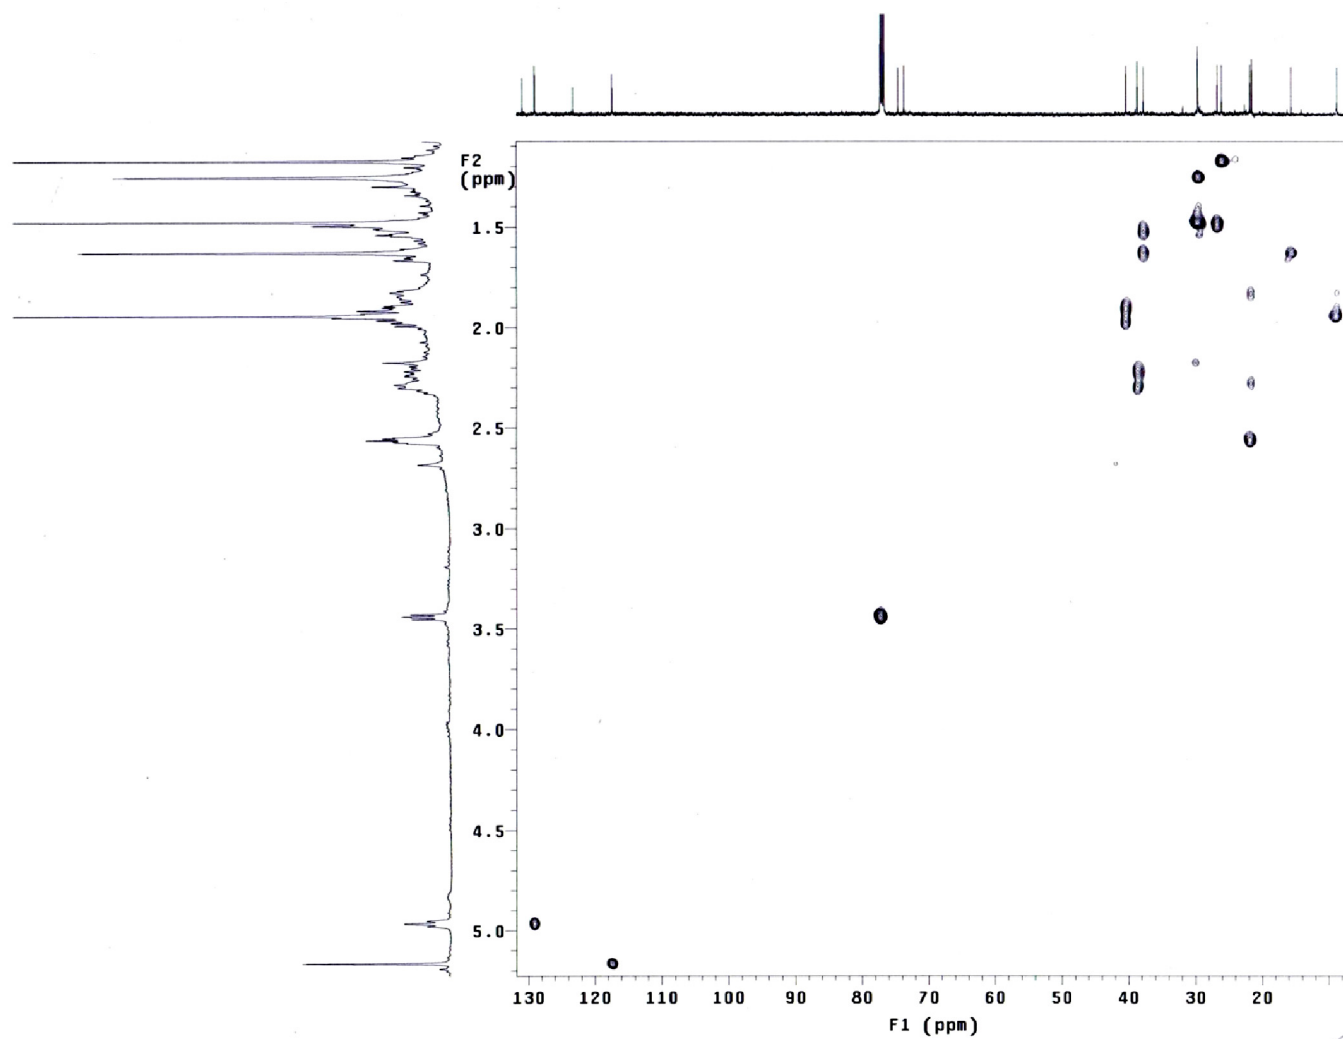

Figure S17. HMQC spectrum of 2 in CDCl<sub>3</sub>

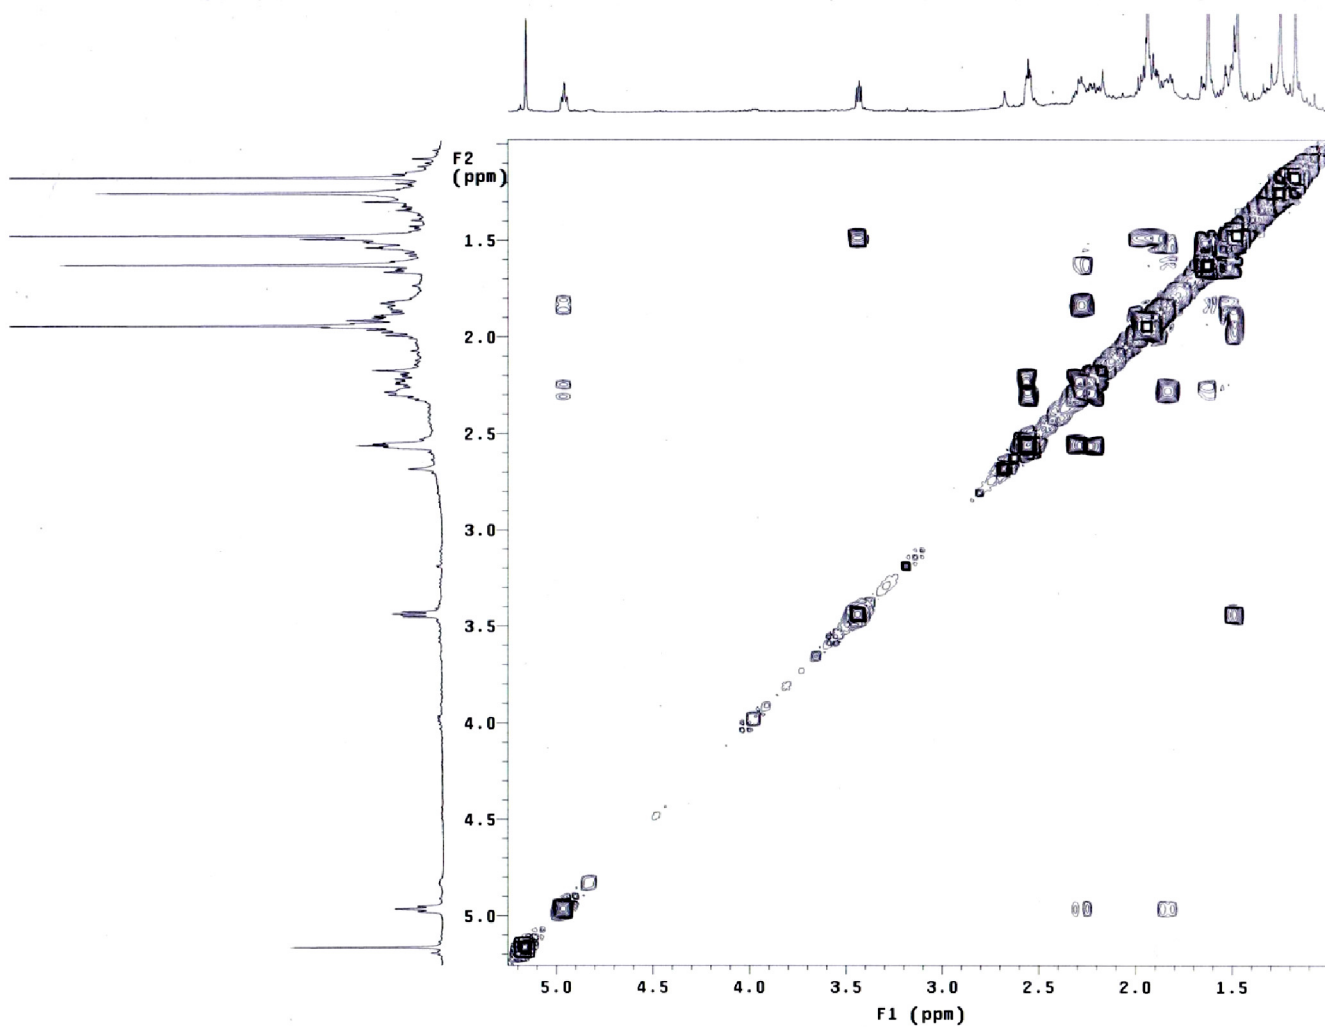

**Figure S18.** COSY spectrum of **2** in CDCl<sub>3</sub>

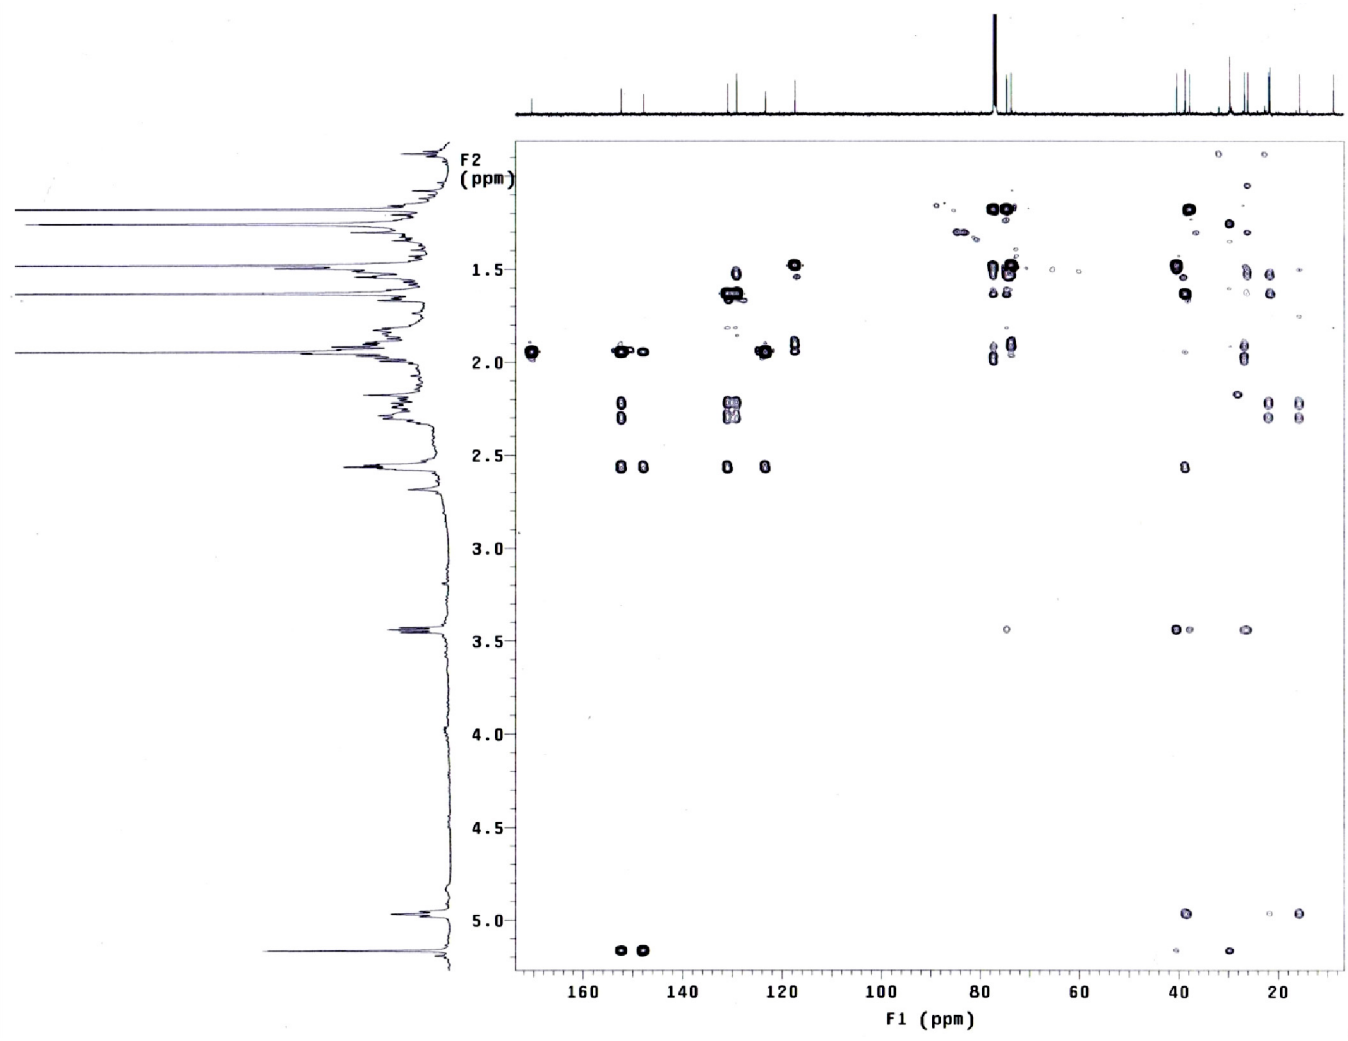

Figure S19. HMBC spectrum of **2** in CDCl<sub>3</sub>

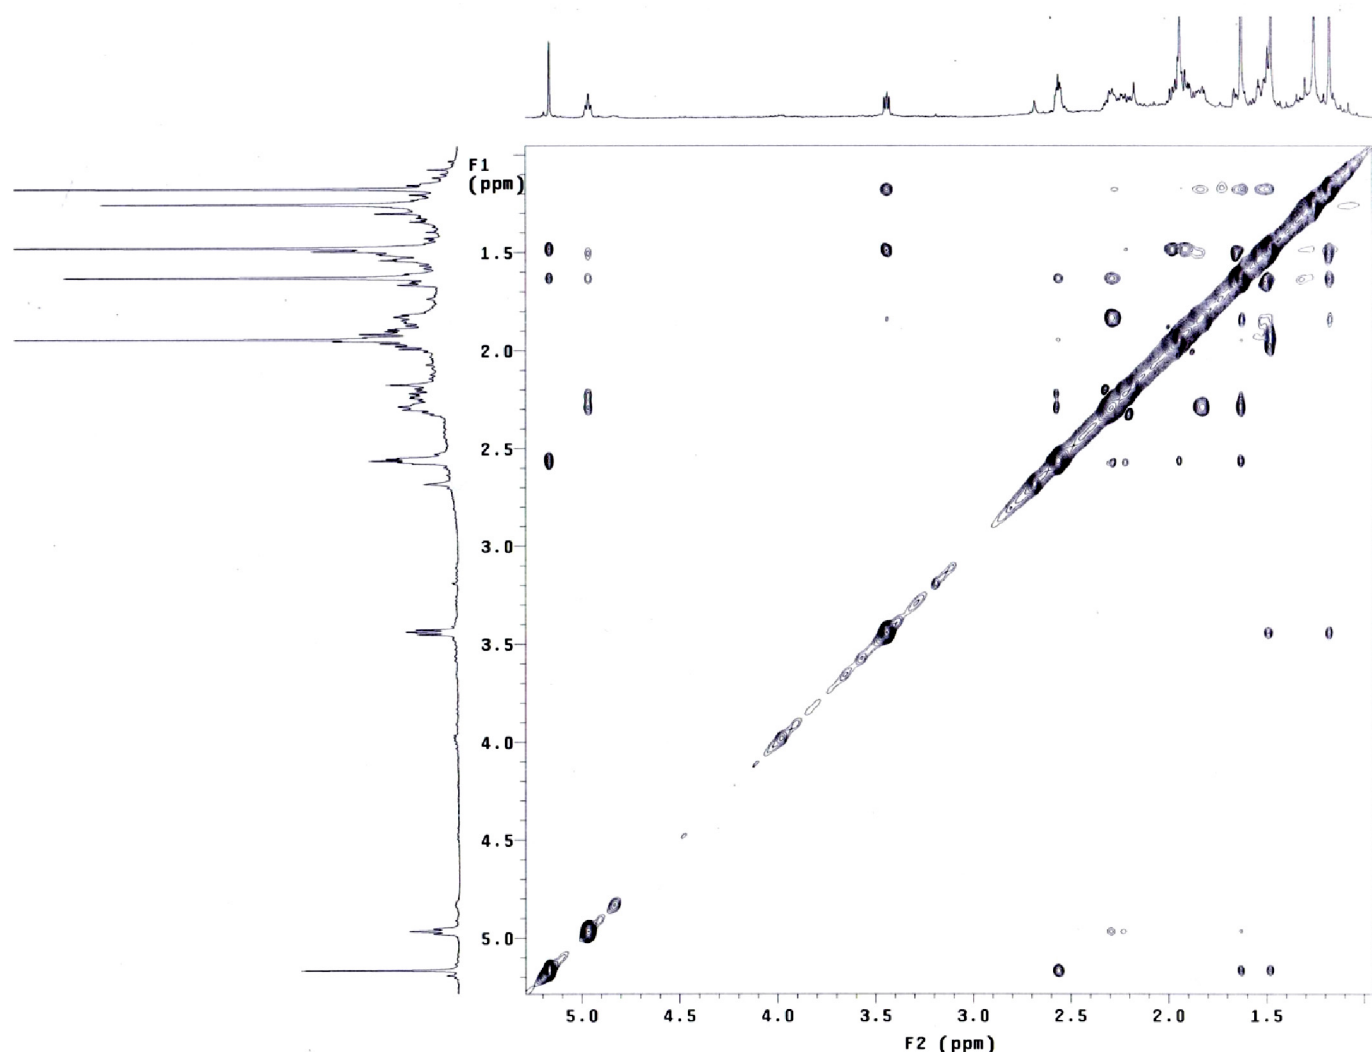

**Figure S20.** NOESY spectrum of **2** in CDCl<sub>3</sub>

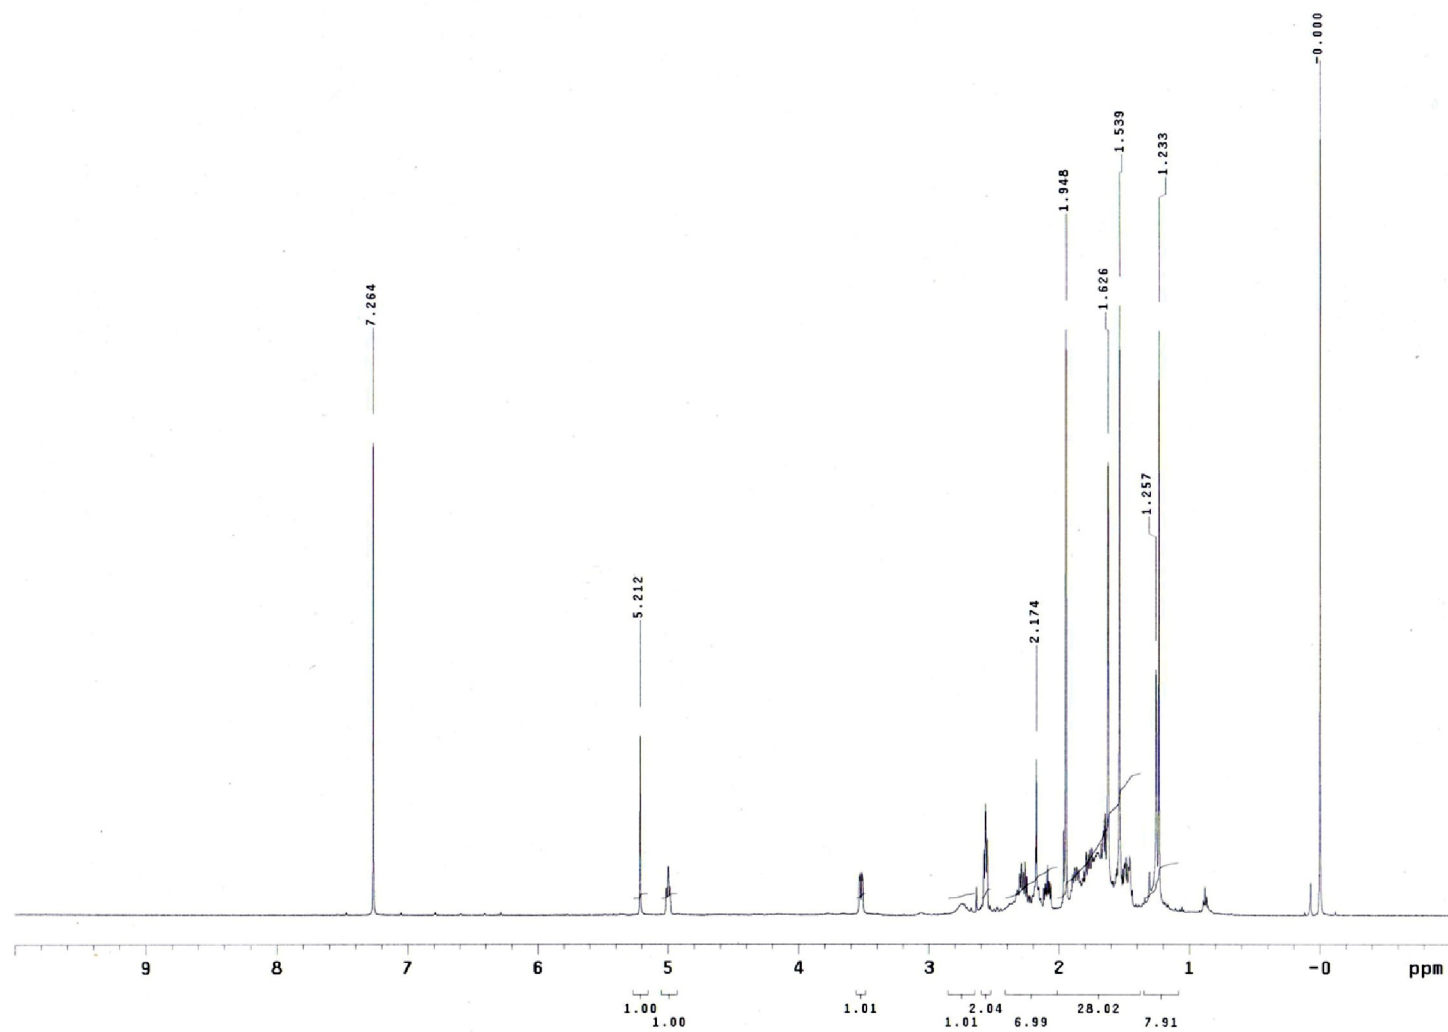

Figure S21.  $^1\text{H}$  NMR spectrum of **3** in  $\text{CDCl}_3$

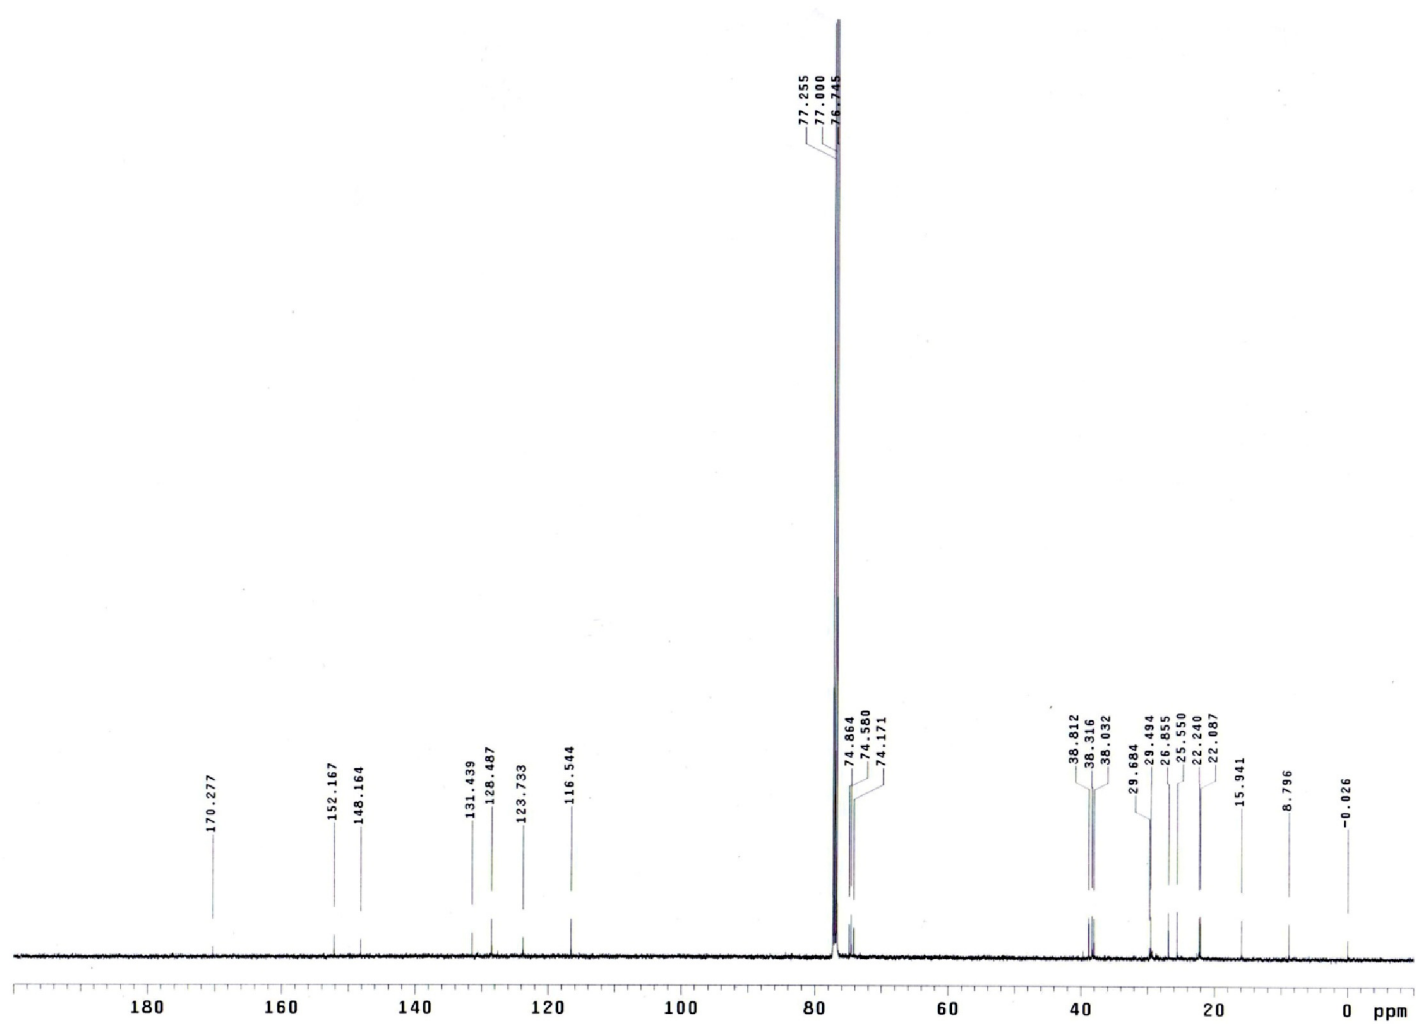

Figure S22.  $^{13}\text{C}$  NMR spectrum of **3** in  $\text{CDCl}_3$



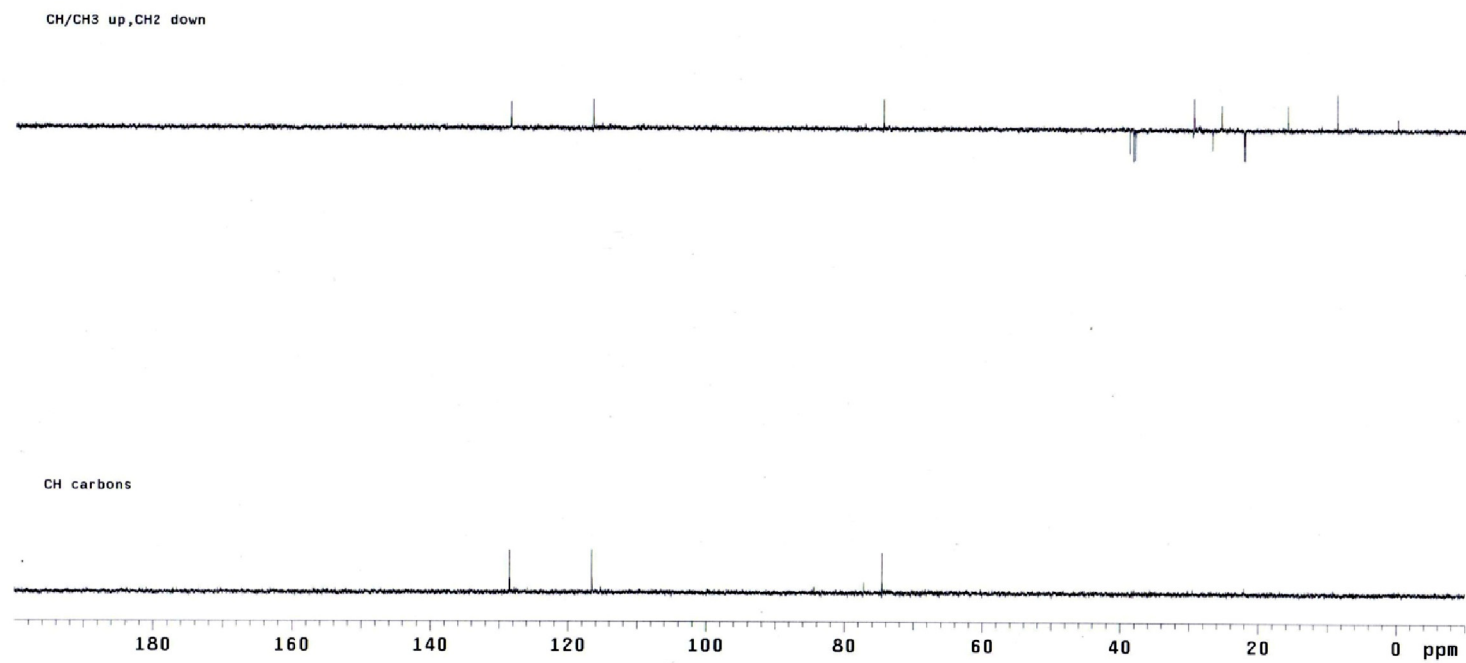

**Figure S23.** DEPT spectra of **3** in  $\text{CDCl}_3$

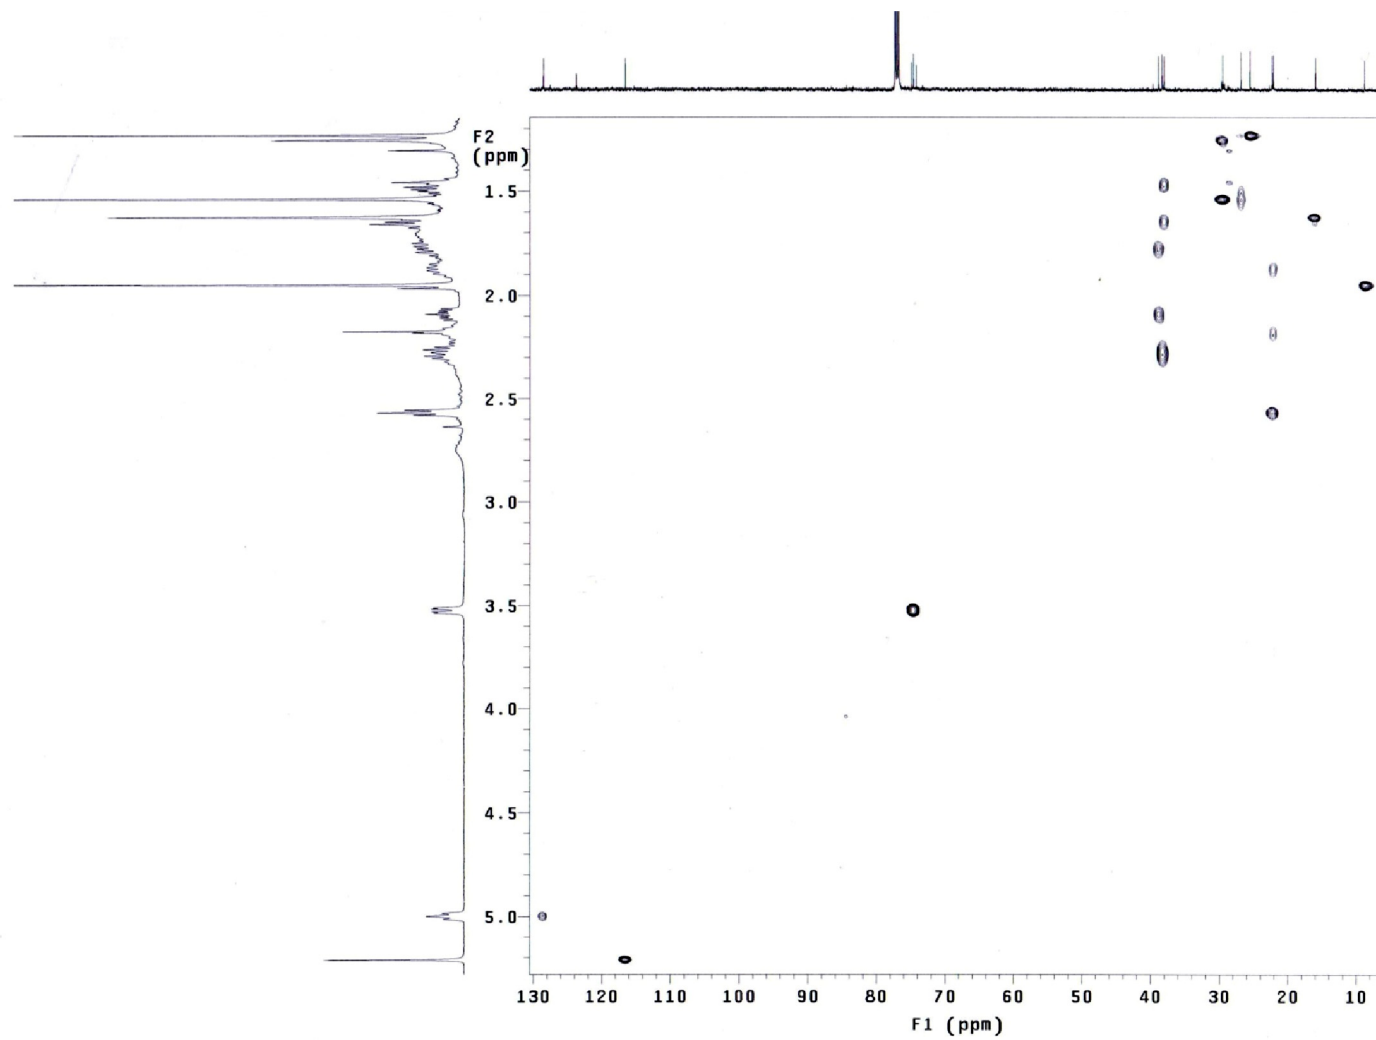

**Figure S24.** HMQC spectrum of **3** in CDCl<sub>3</sub>

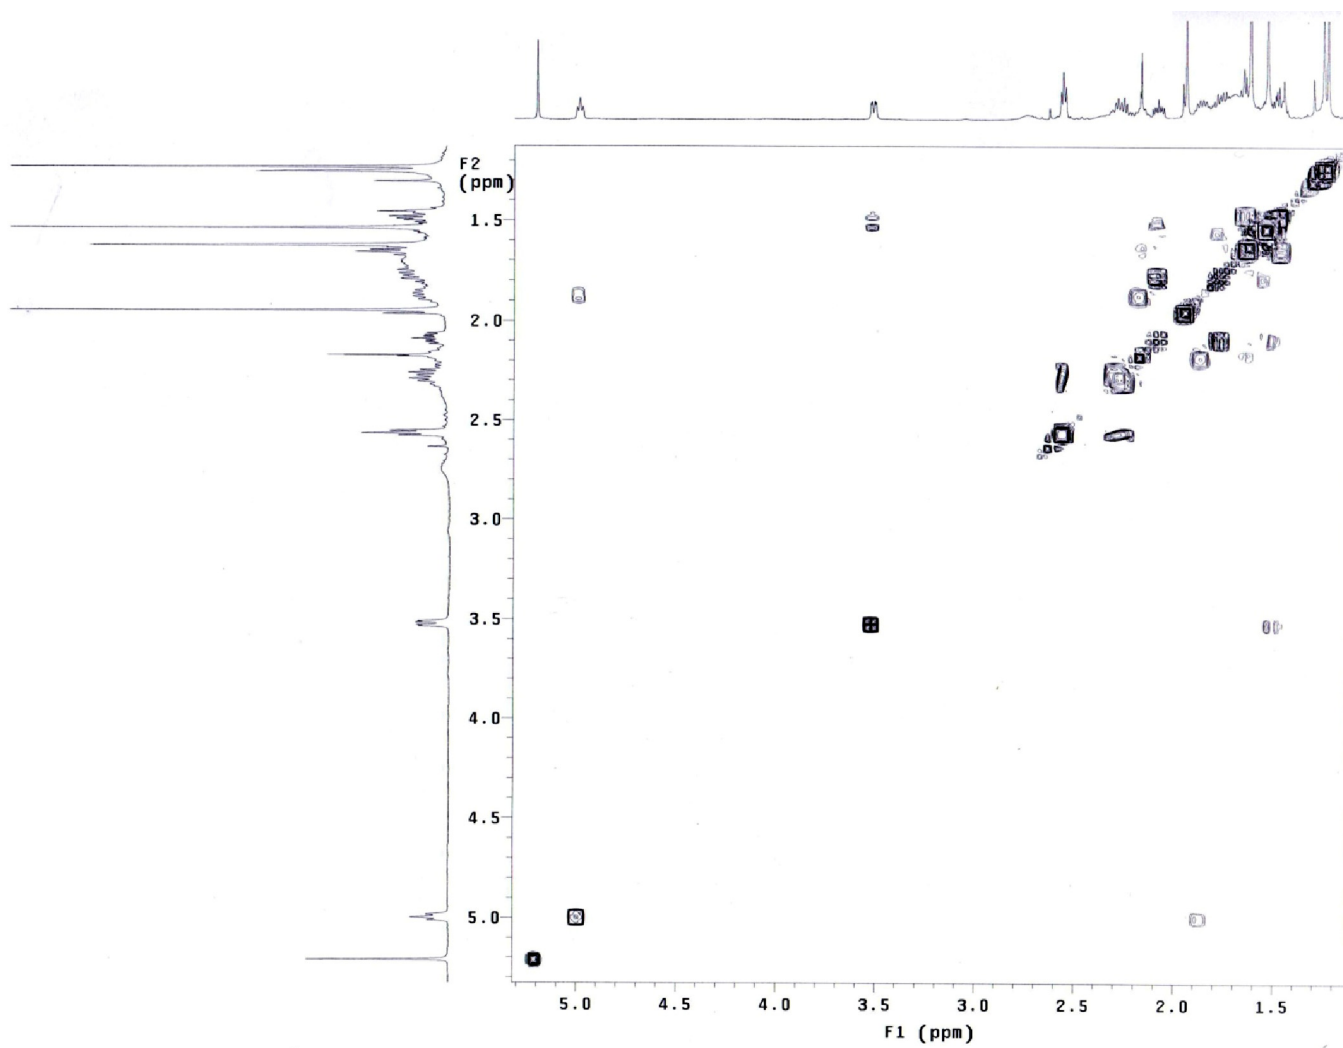

**Figure S25.** COSY spectrum of **3** in CDCl<sub>3</sub>

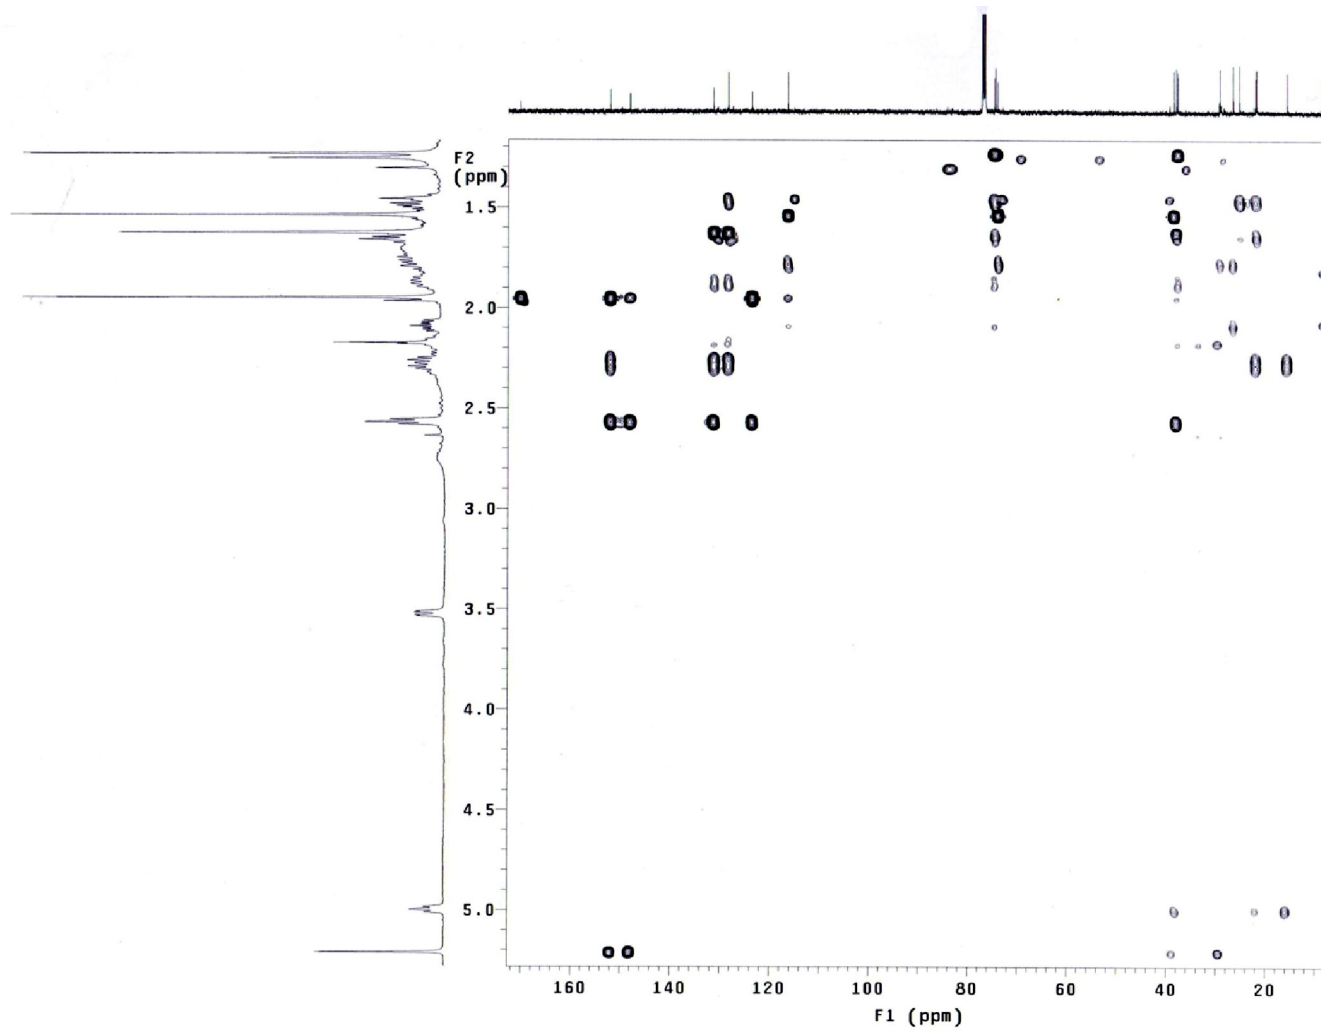

Figure S26. HMBC spectrum of **3** in CDCl<sub>3</sub>

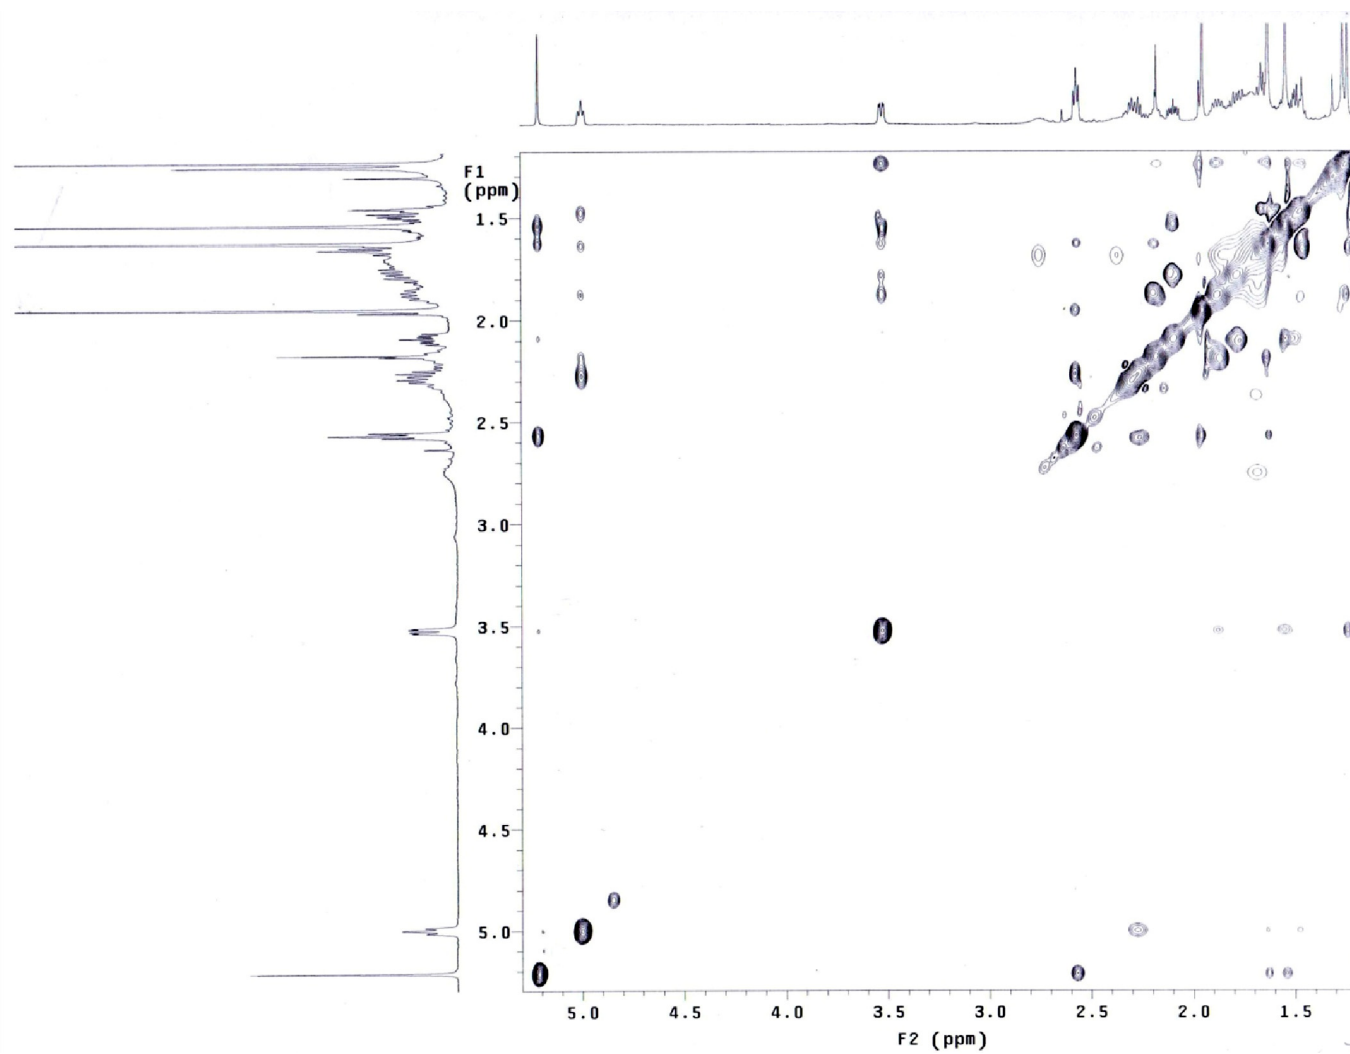

Figure S27. NOESY spectrum of **3** in CDCl<sub>3</sub>

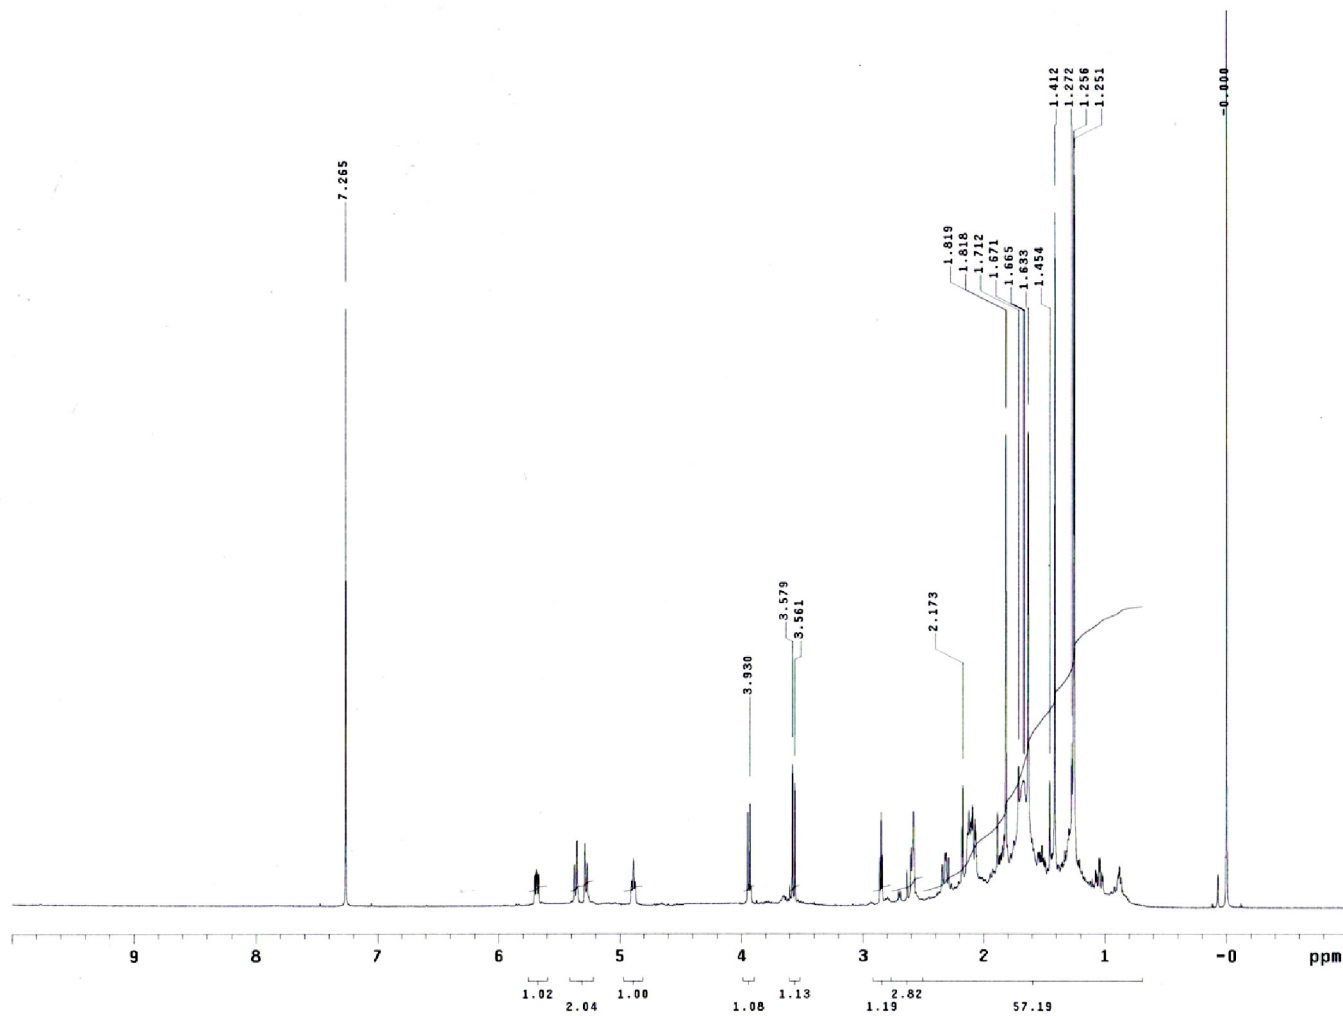

**Figure S28.** <sup>1</sup>H NMR spectrum of **4** in CDCl<sub>3</sub>

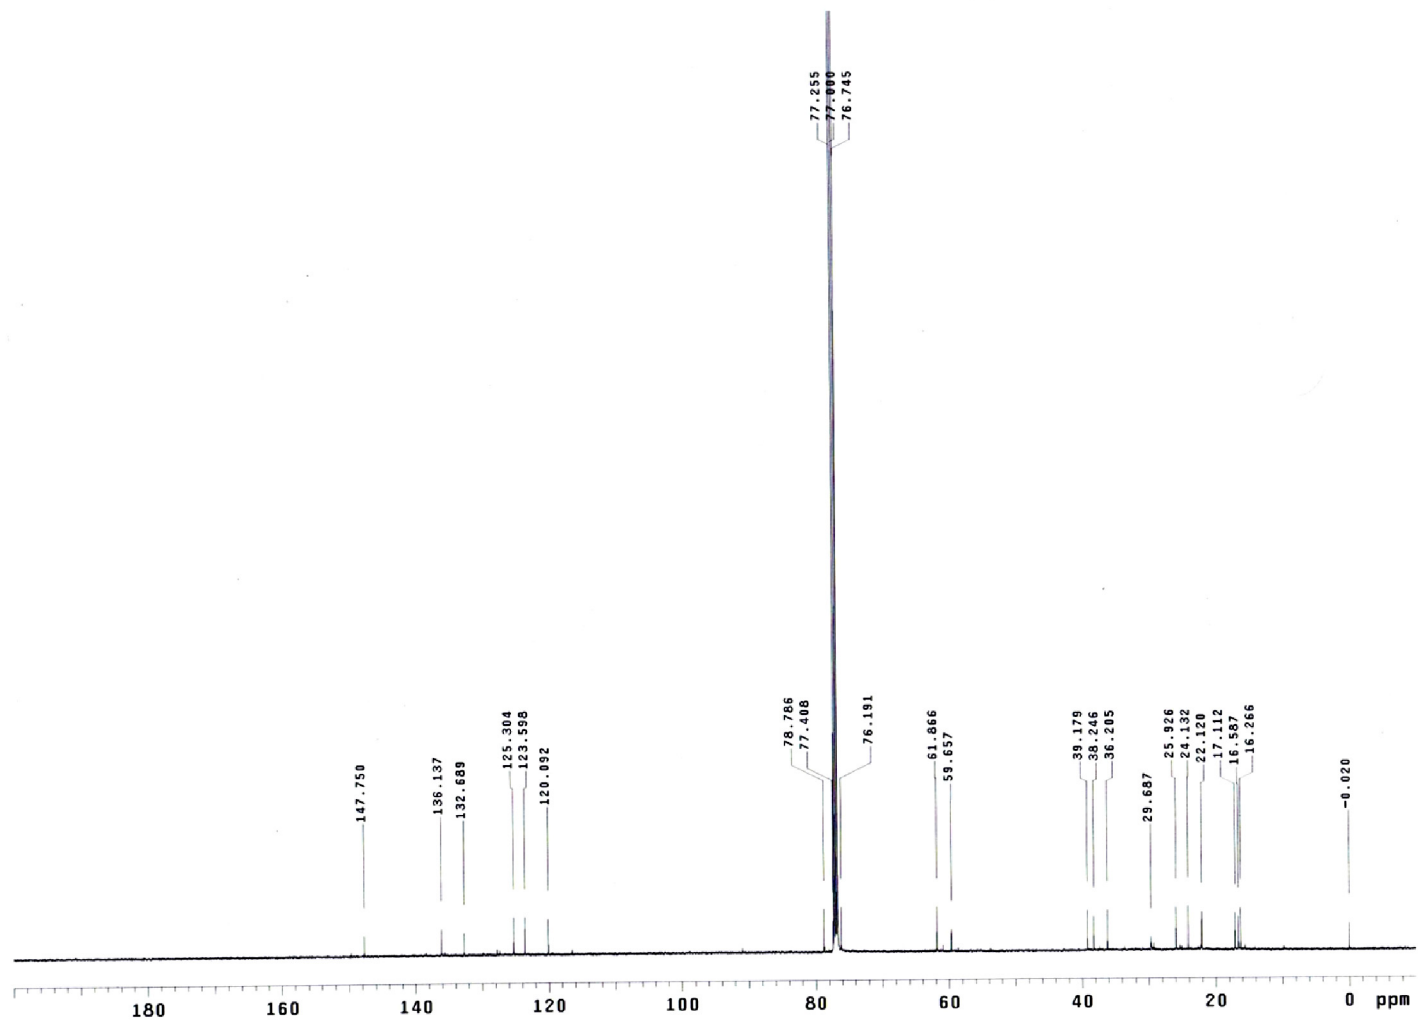

Figure S29. <sup>13</sup>C NMR spectrum of 4 in CDCl<sub>3</sub>

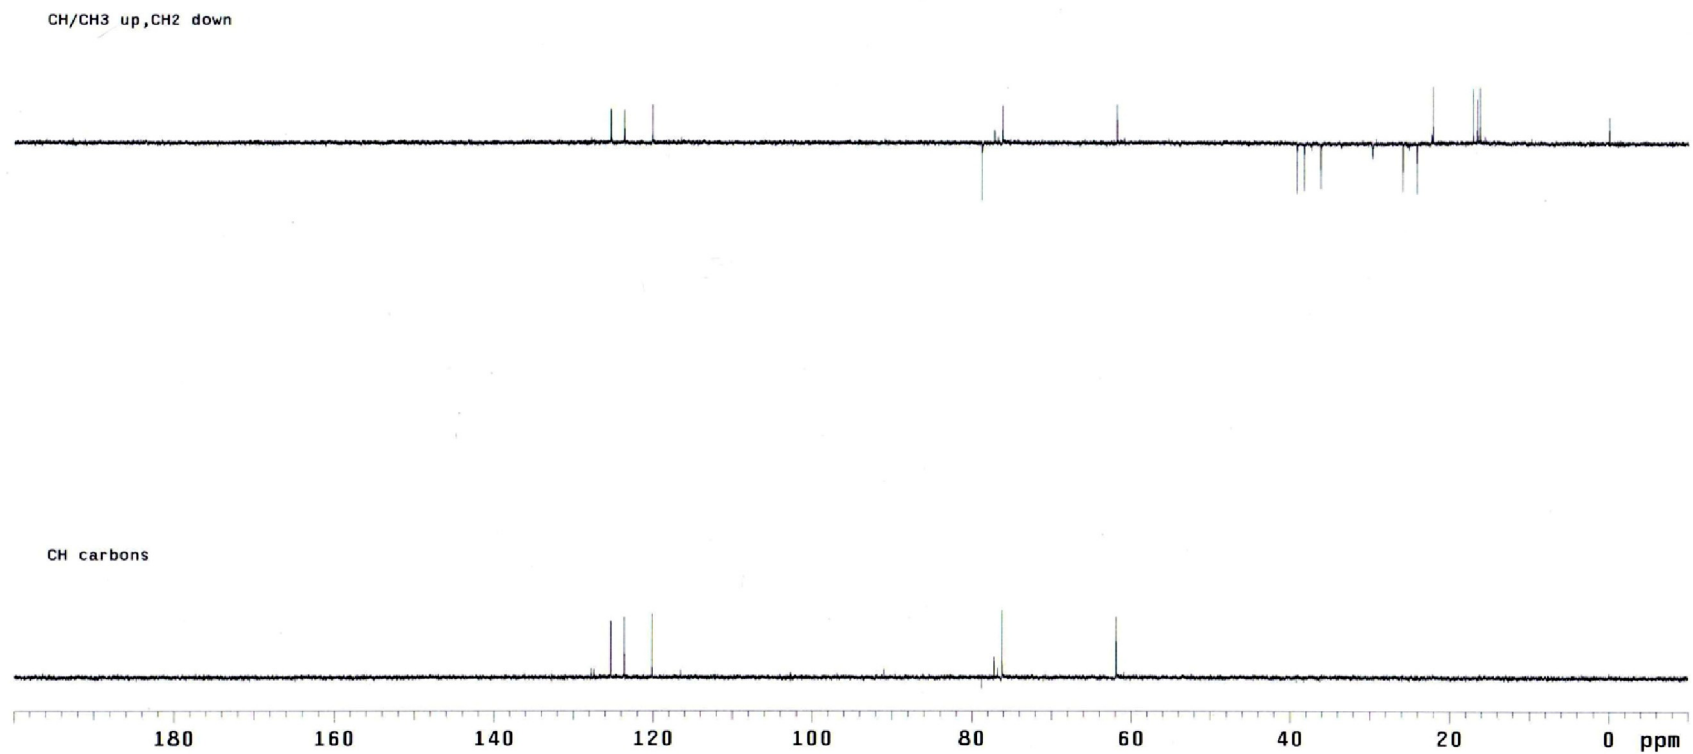

Figure S30. DEPT spectra of **4** in CDCl<sub>3</sub>



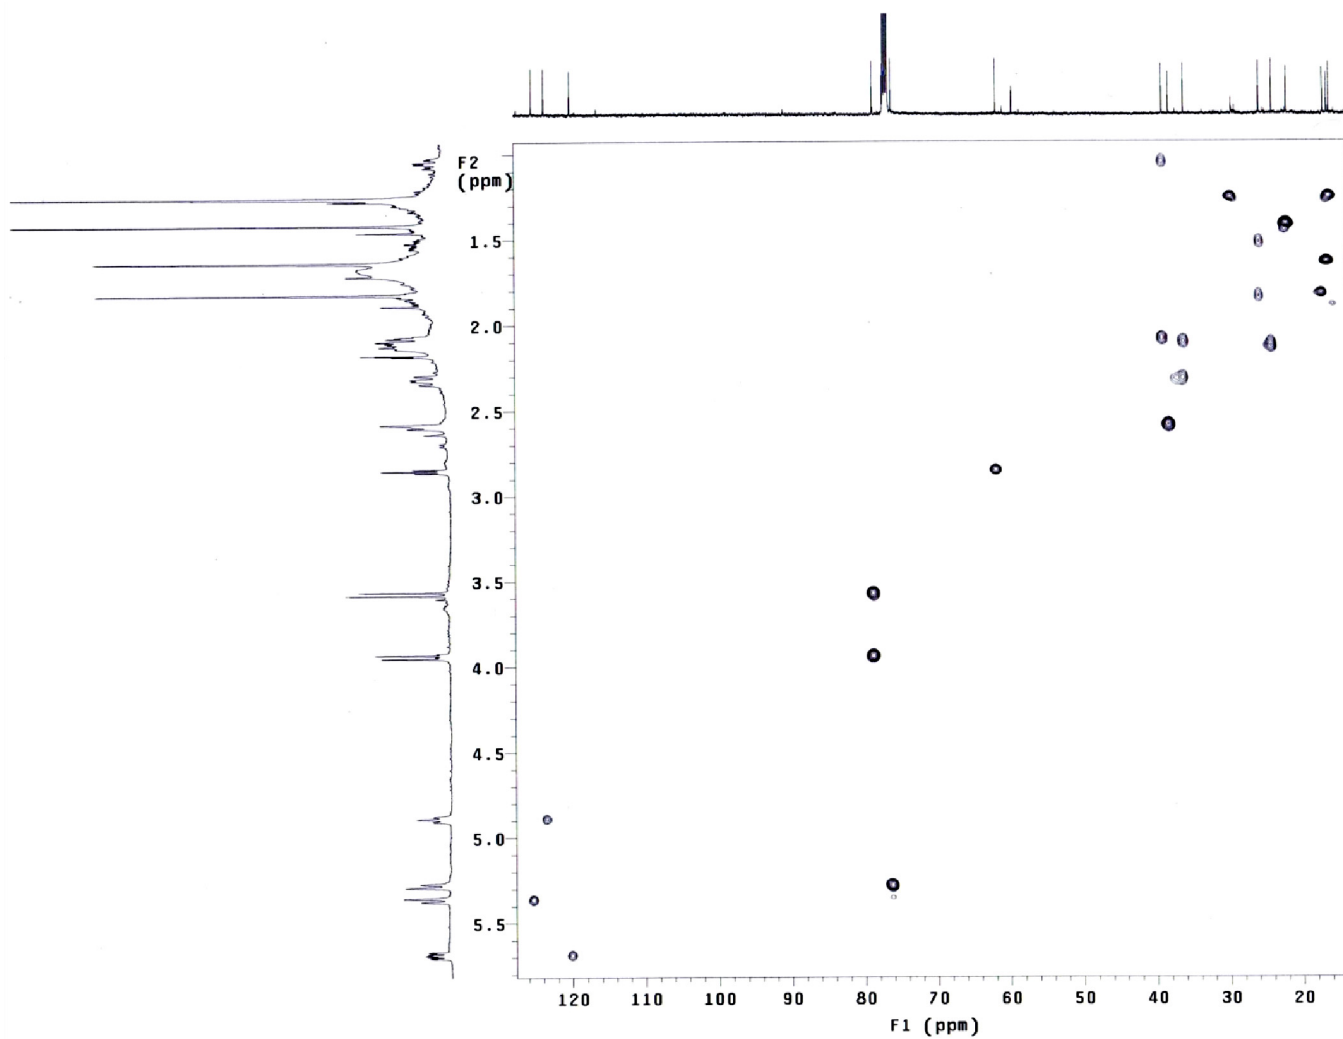

**Figure S31.** HMQC spectrum of **4** in CDCl<sub>3</sub>

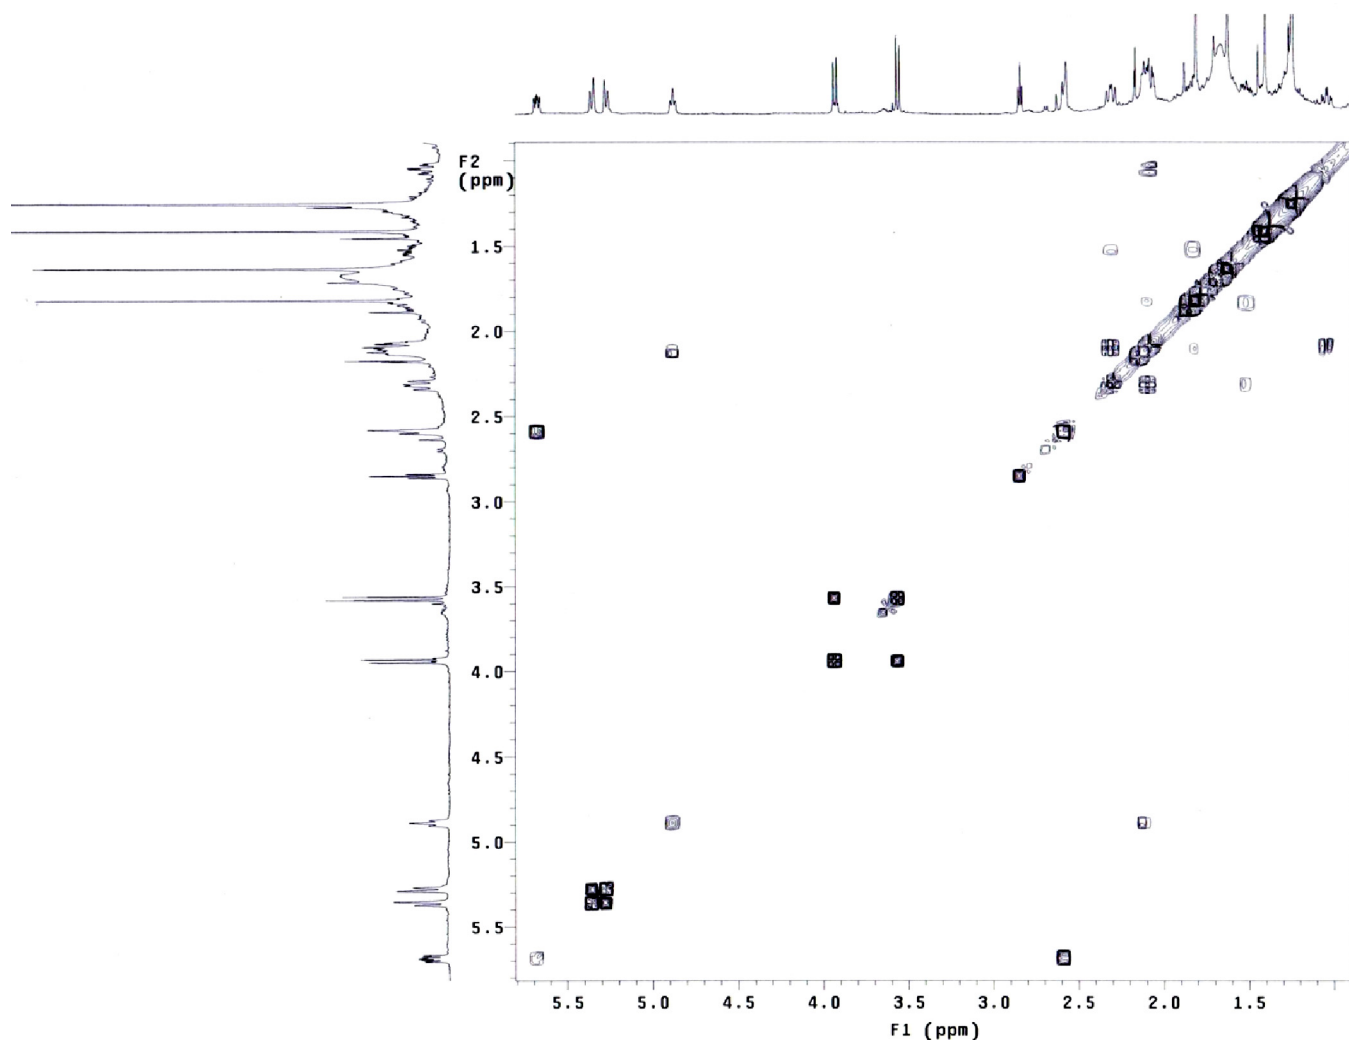

Figure S32. COSY spectrum of 4 in CDCl<sub>3</sub>

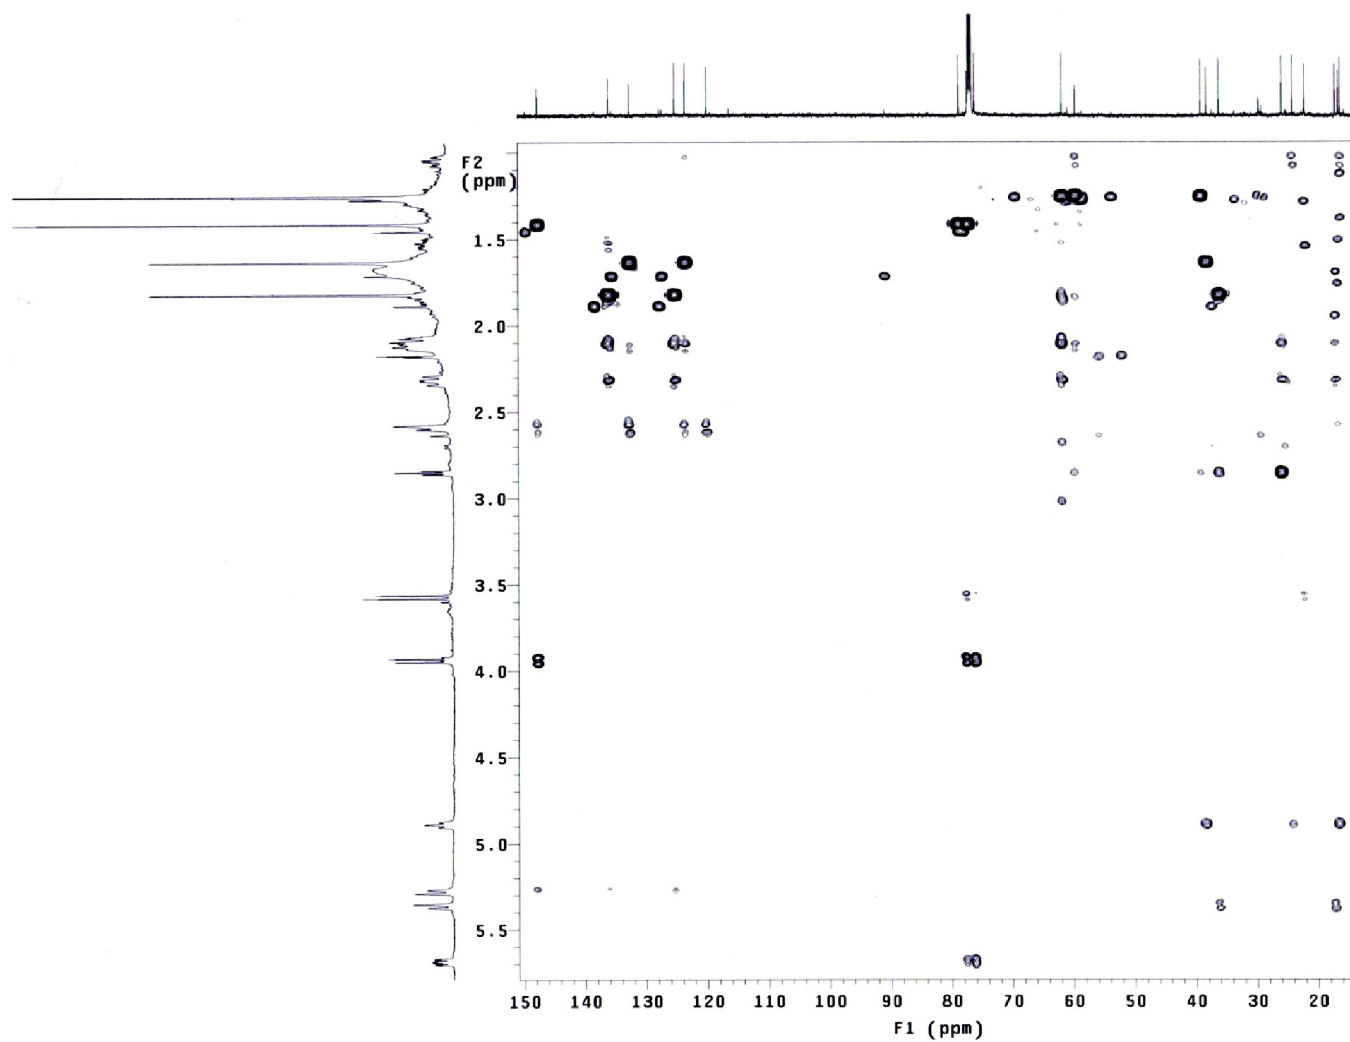

Figure S33. HMBC spectrum of 4 in CDCl<sub>3</sub>

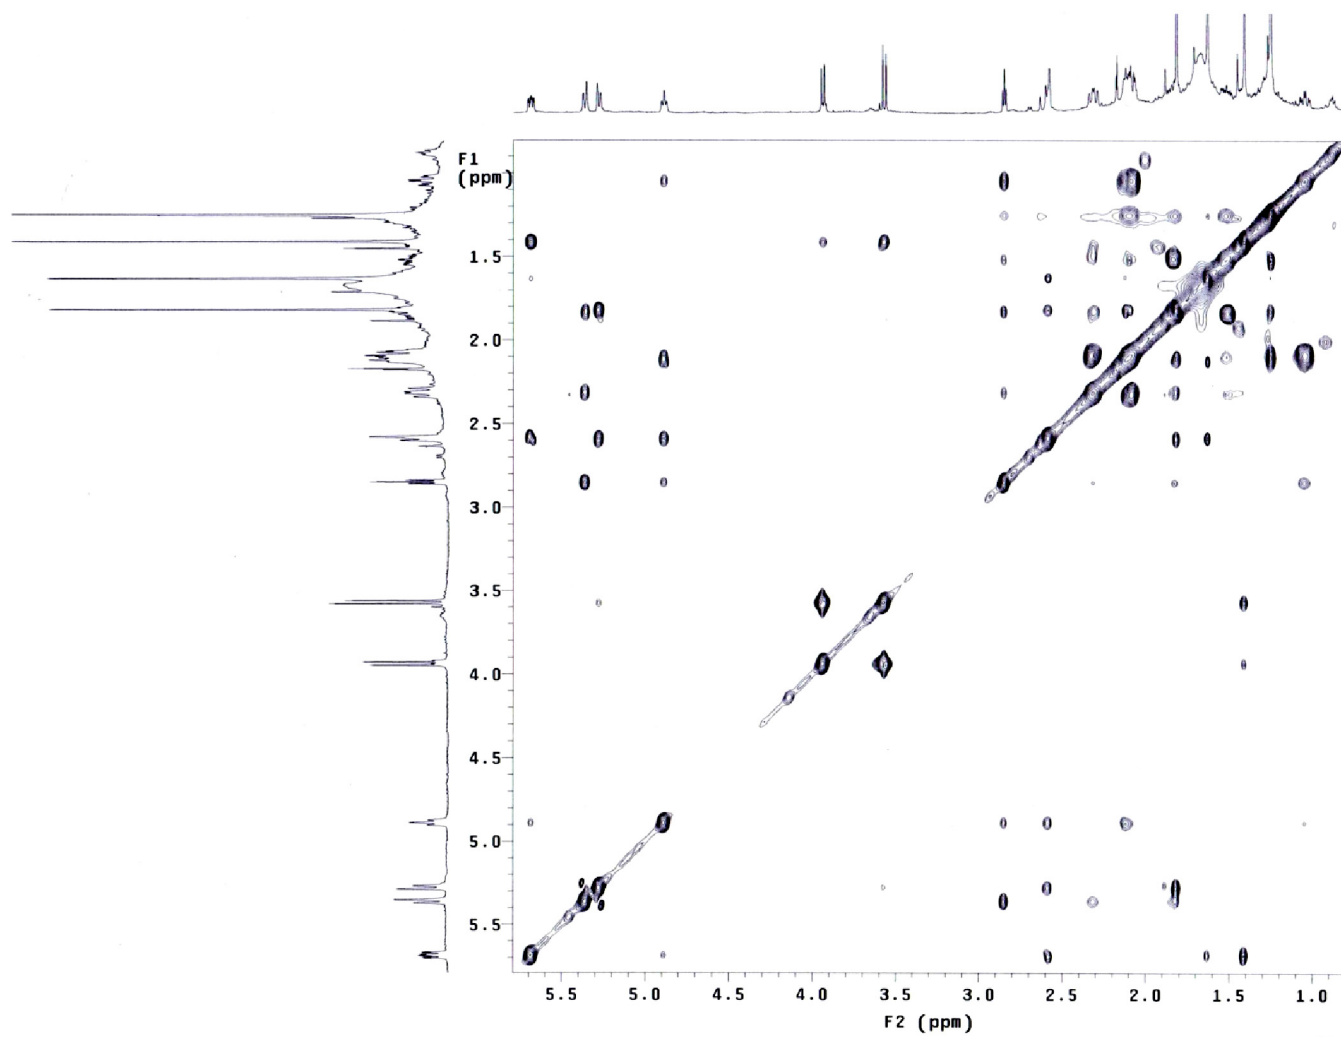

Figure S34. NOESY spectrum of **4** in CDCl<sub>3</sub>

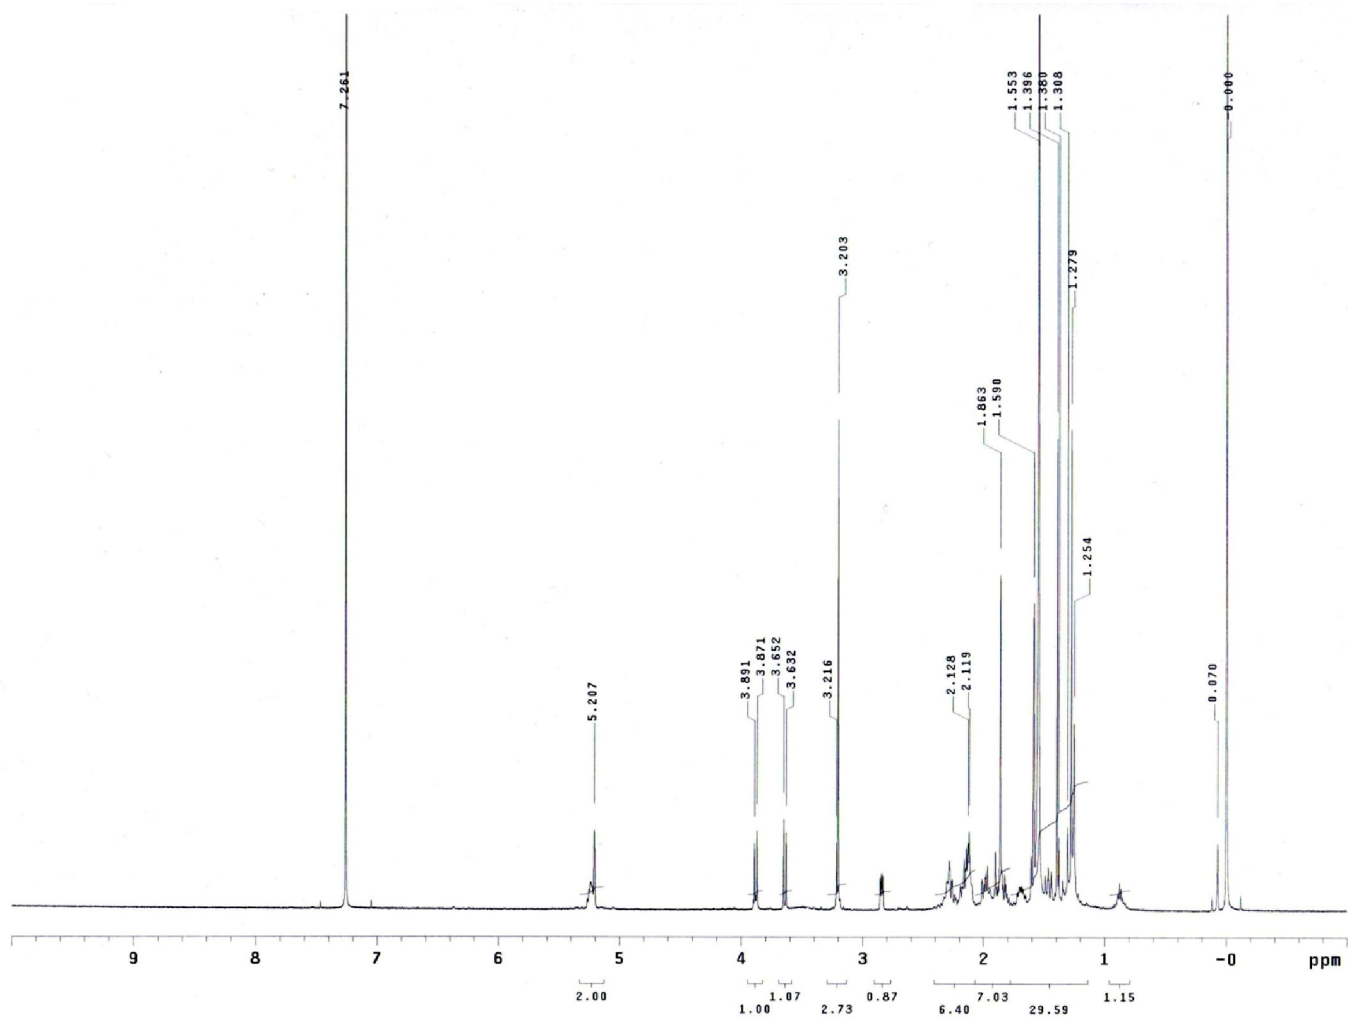

Figure S35.  $^1\text{H}$  NMR spectrum of **5** in  $\text{CDCl}_3$

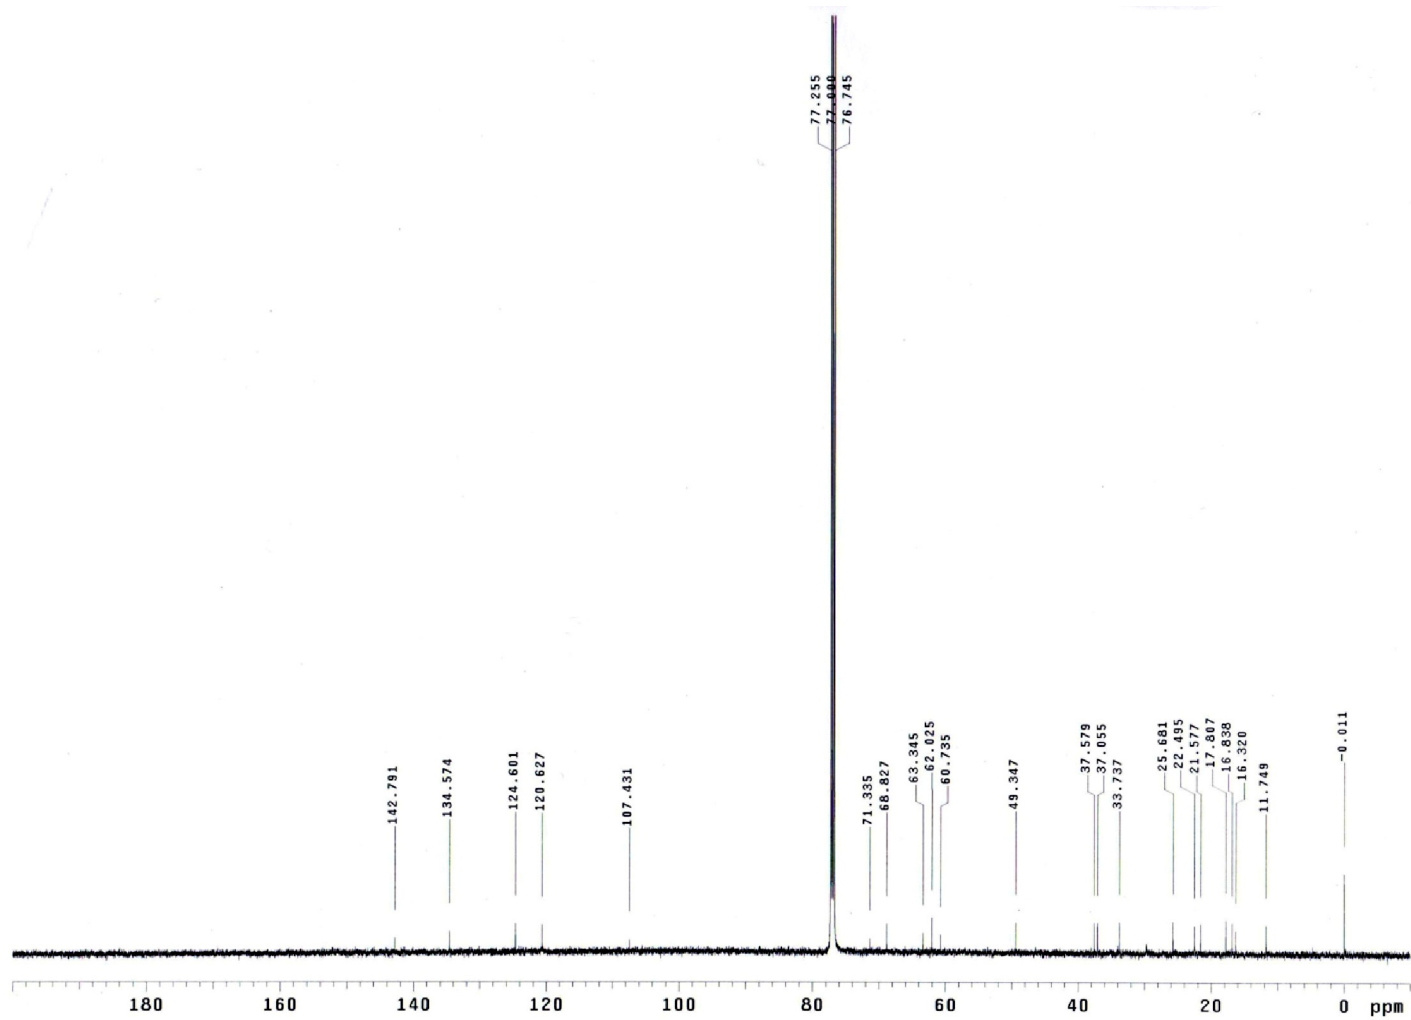

Figure S36.  $^{13}\text{C}$  NMR spectrum of **5** in  $\text{CDCl}_3$

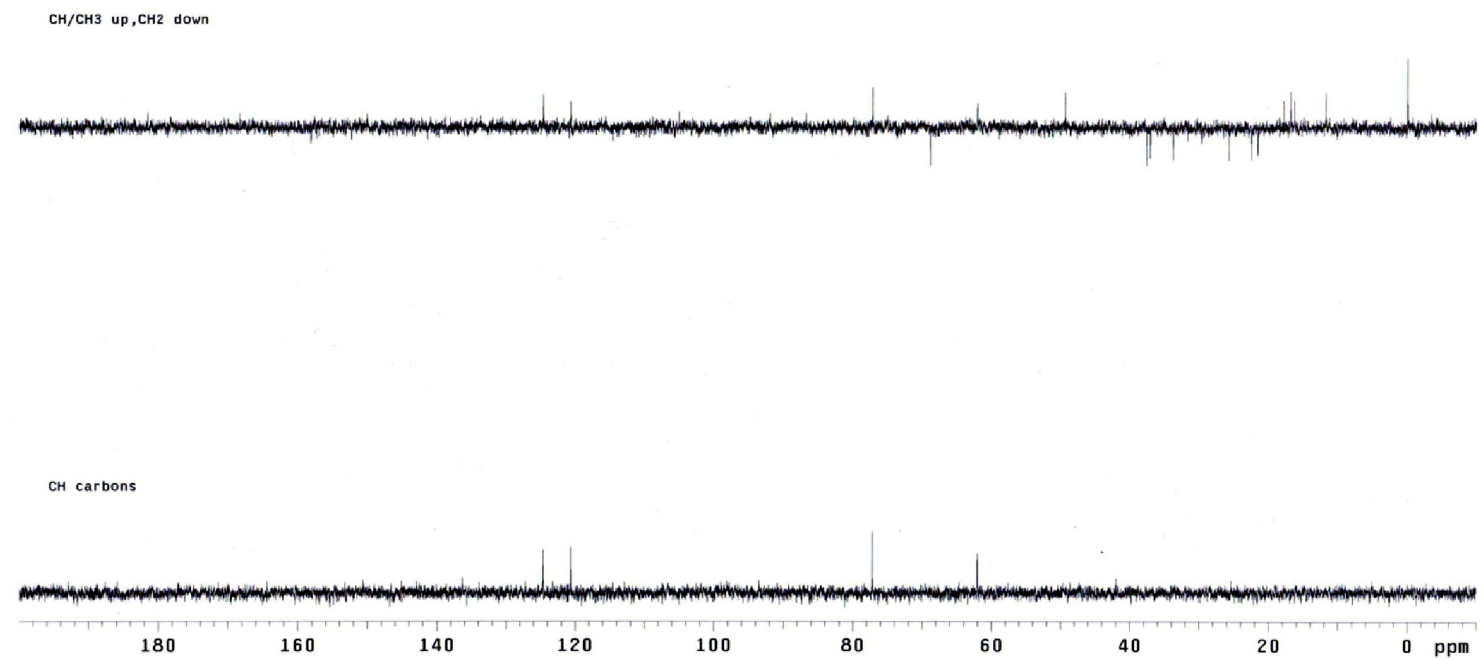

Figure S37. DEPT spectra of 5 in CDCl<sub>3</sub>

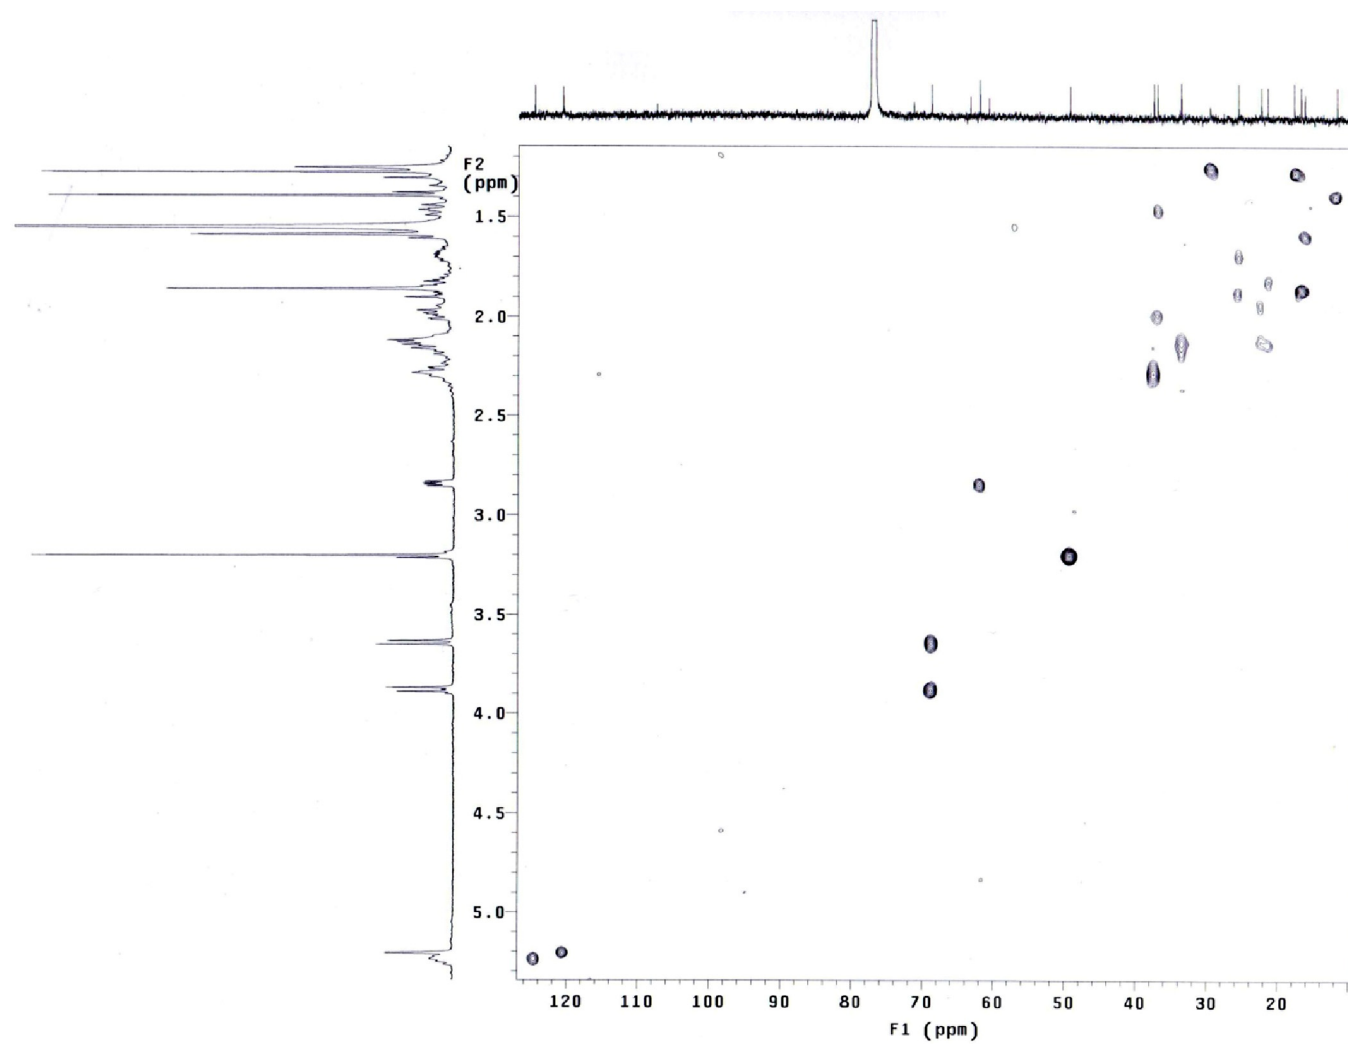

**Figure S38.** HMQC spectrum of **5** in CDCl<sub>3</sub>



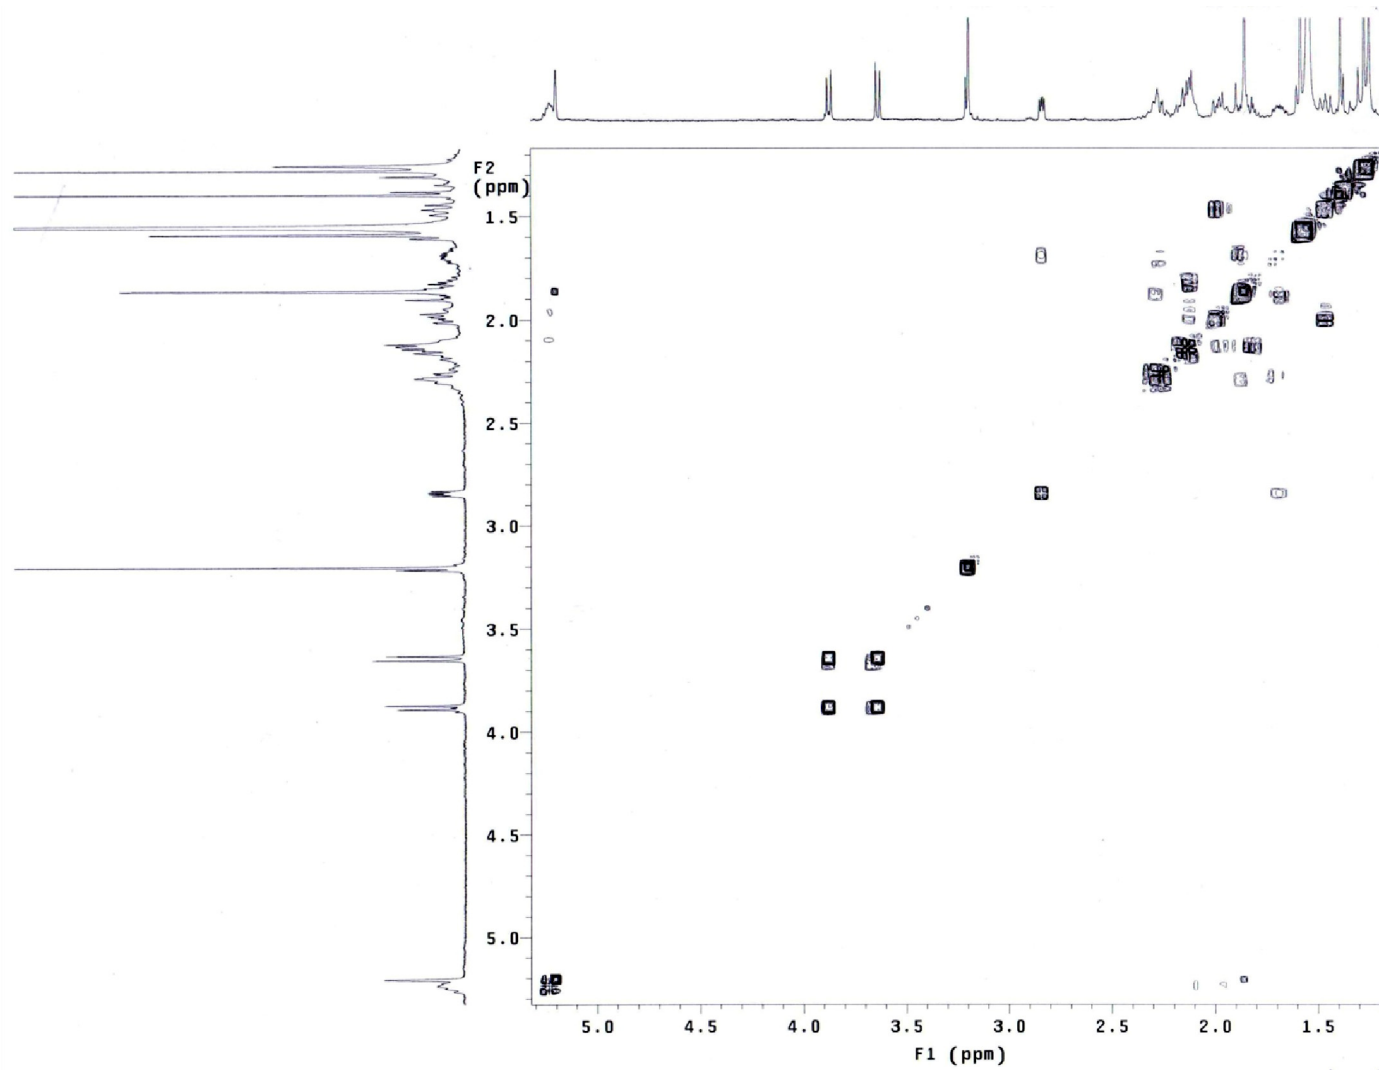

**Figure S39.** COSY spectrum of **5** in CDCl<sub>3</sub>

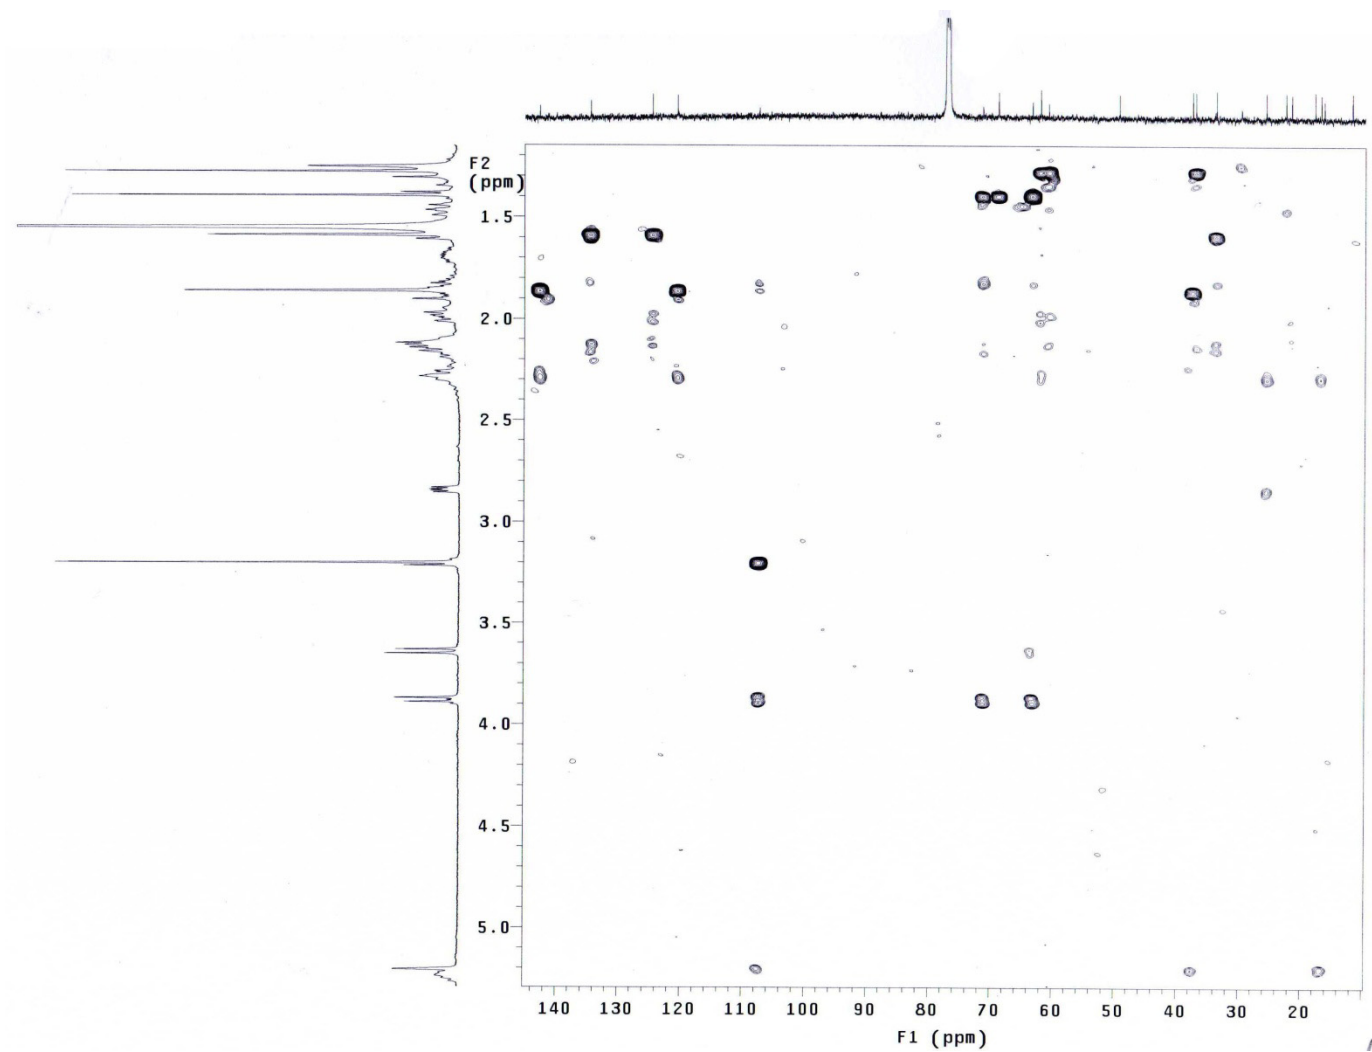

**Figure S40.** HMBC spectrum of **5** in CDCl<sub>3</sub>

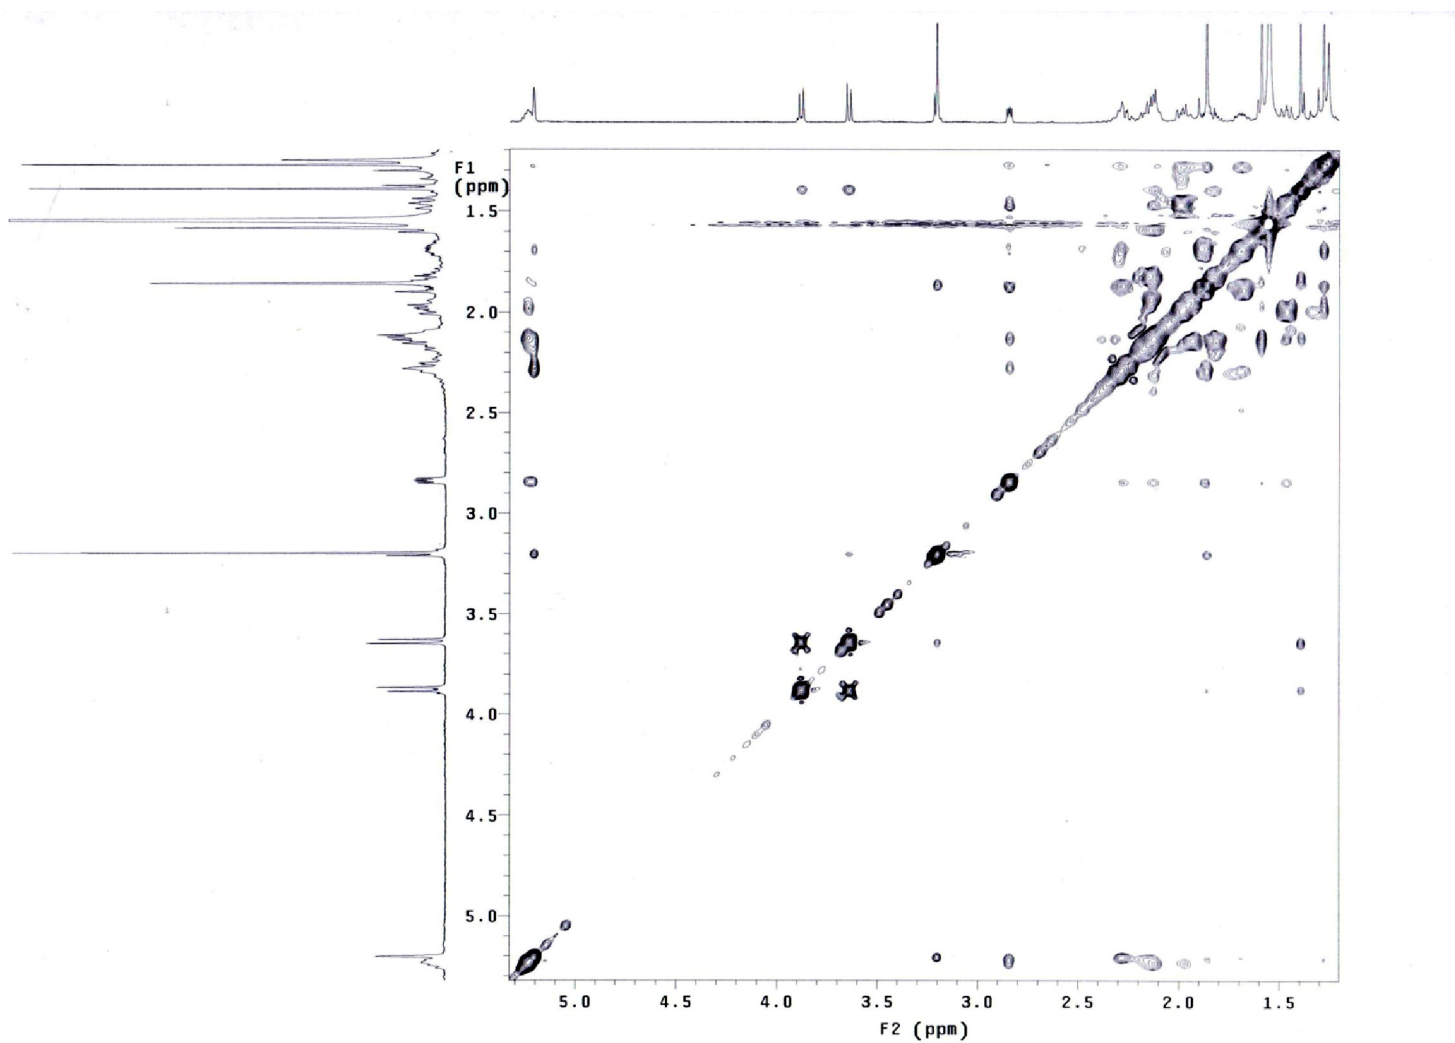

**Figure S41.** NOESY spectrum of **5** in CDCl<sub>3</sub>

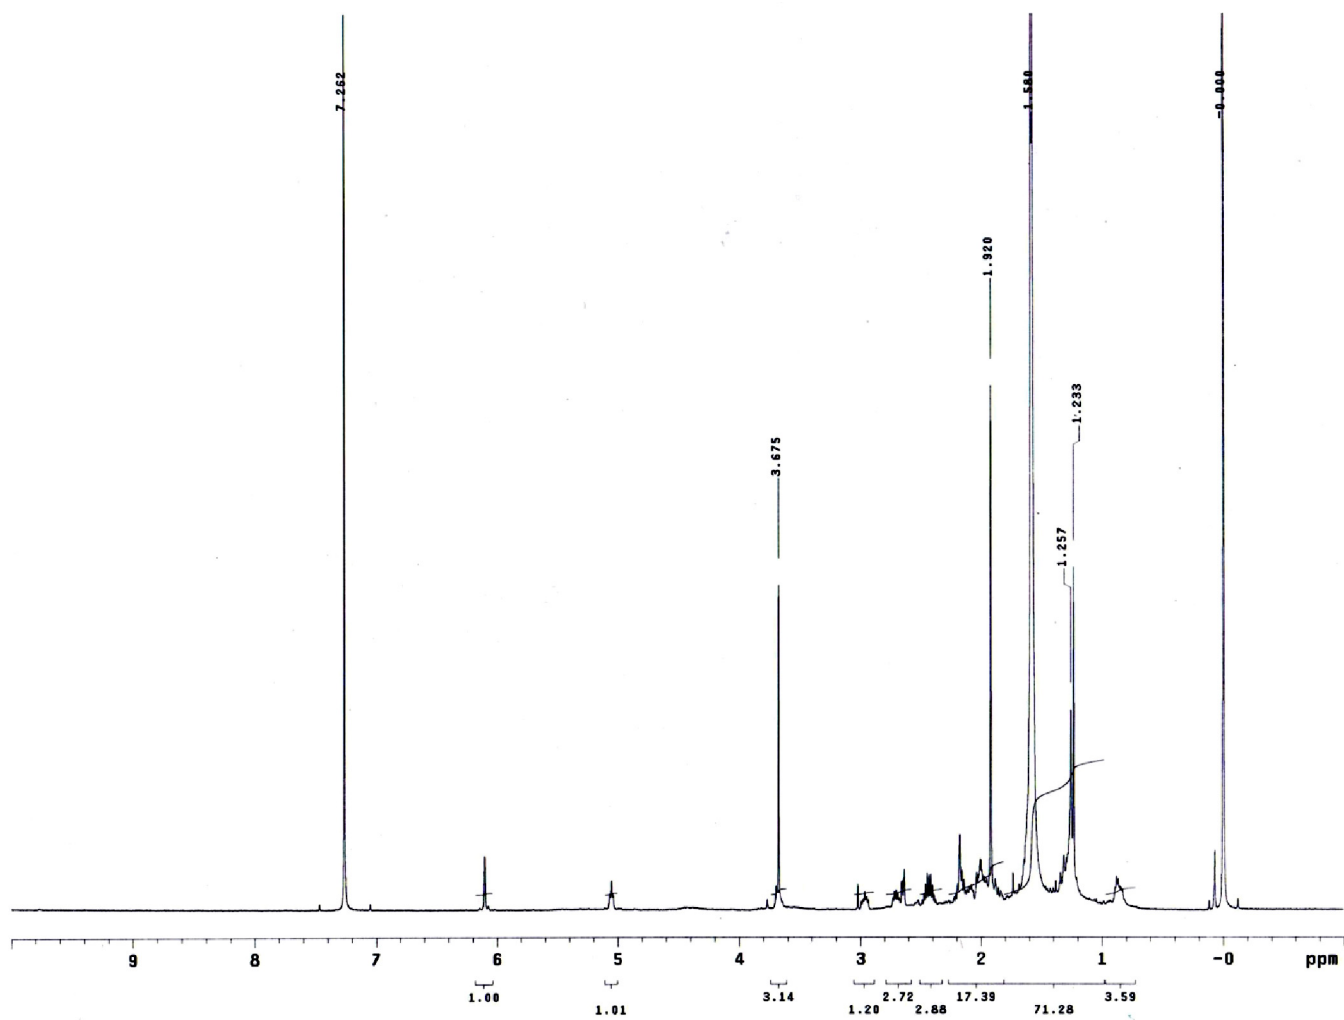

**Figure S42.**  $^1\text{H}$  NMR spectrum of **6** in  $\text{CDCl}_3$

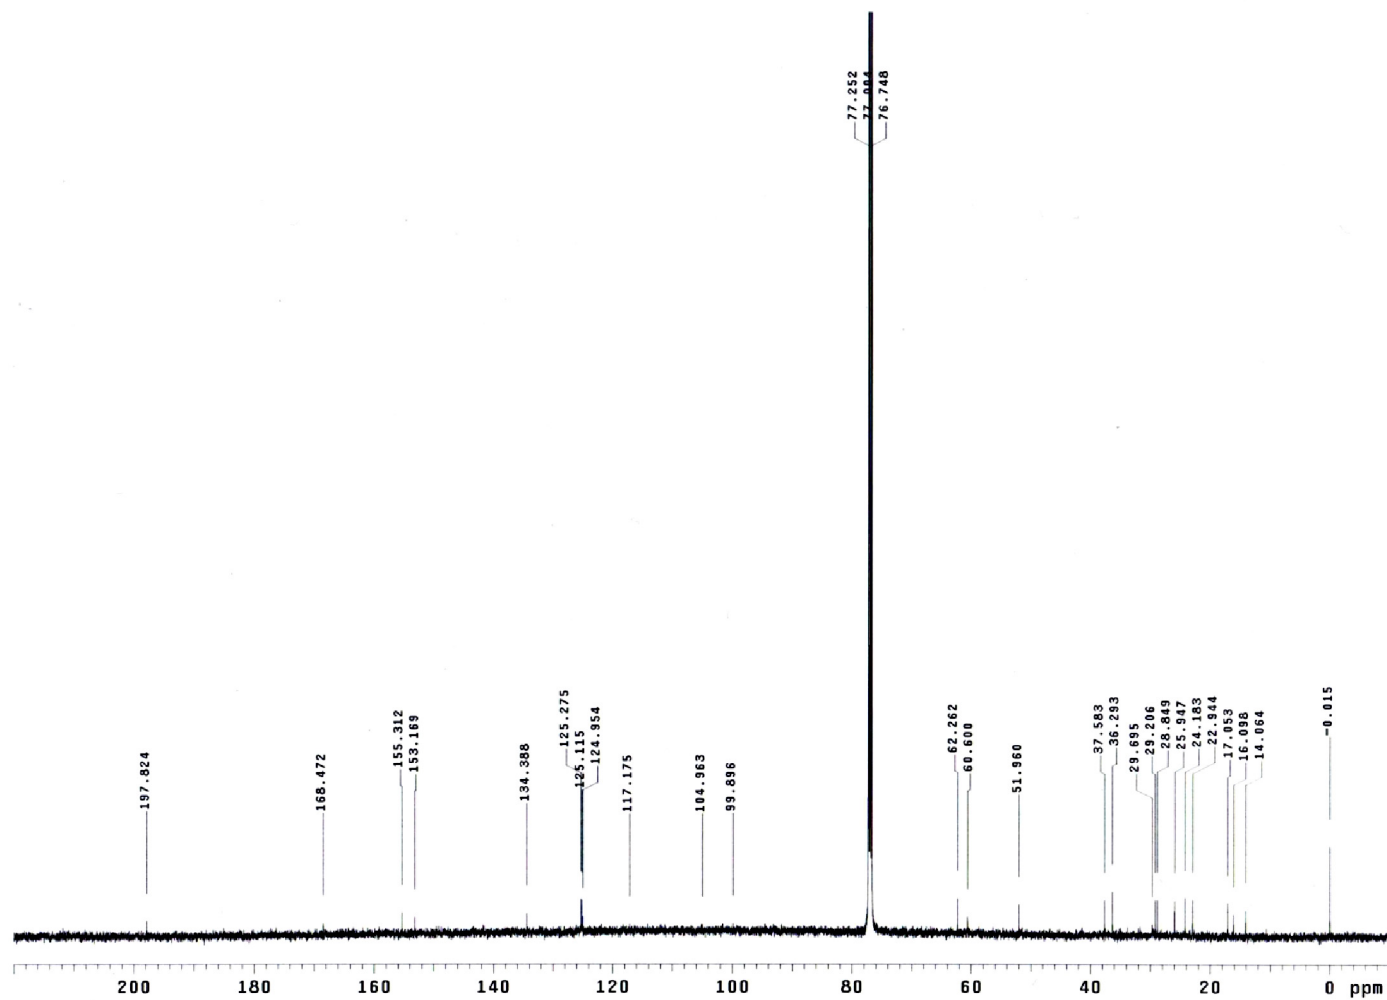

Figure S43. <sup>13</sup>C NMR spectrum of **6** in CDCl<sub>3</sub>

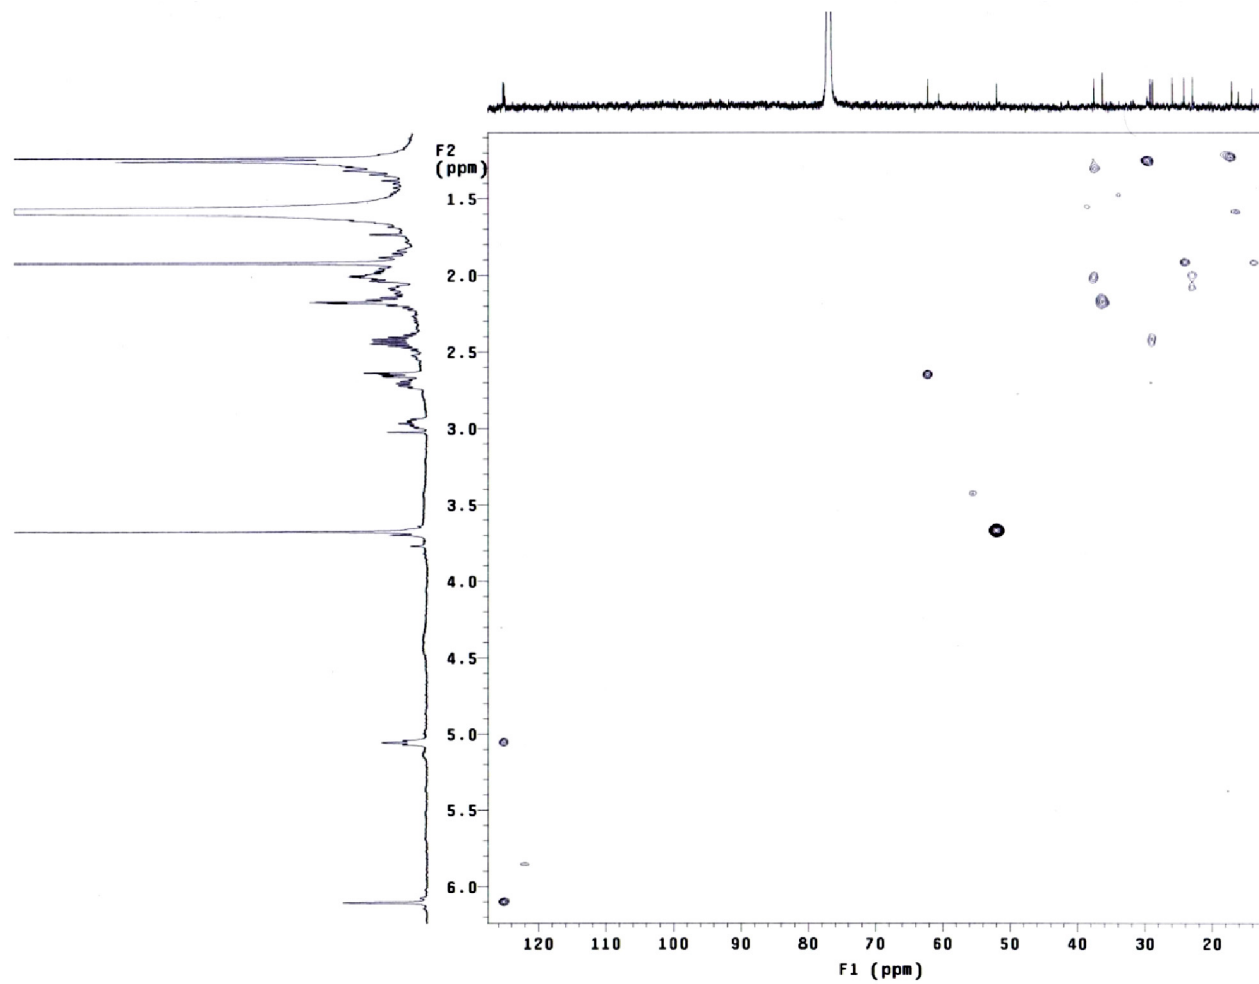

Figure S44. HMQC spectrum of **6** in  $\text{CDCl}_3$

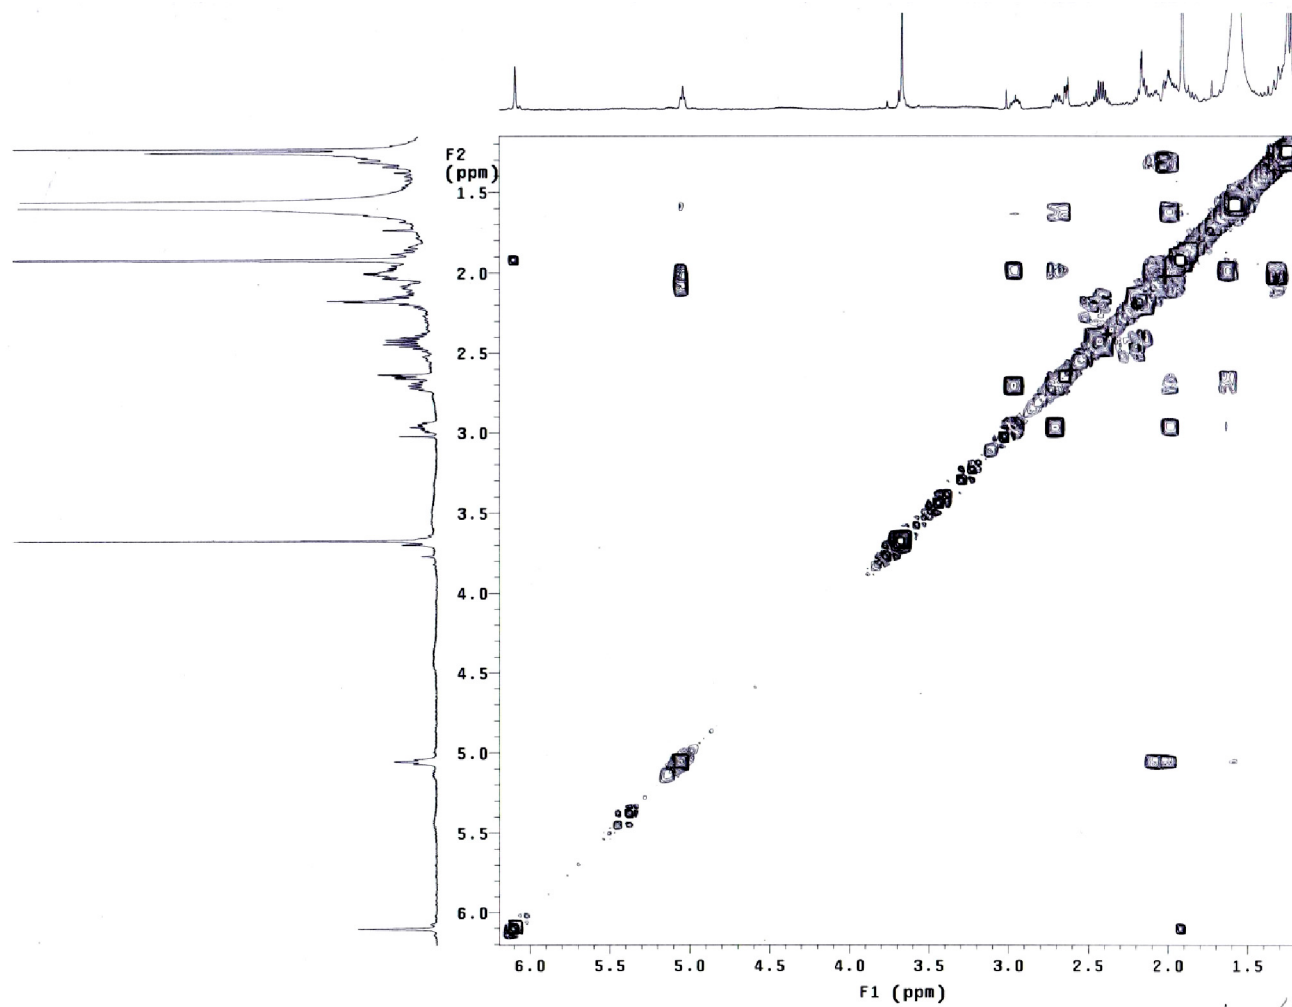

**Figure S45.** COSY spectrum of **6** in CDCl<sub>3</sub>

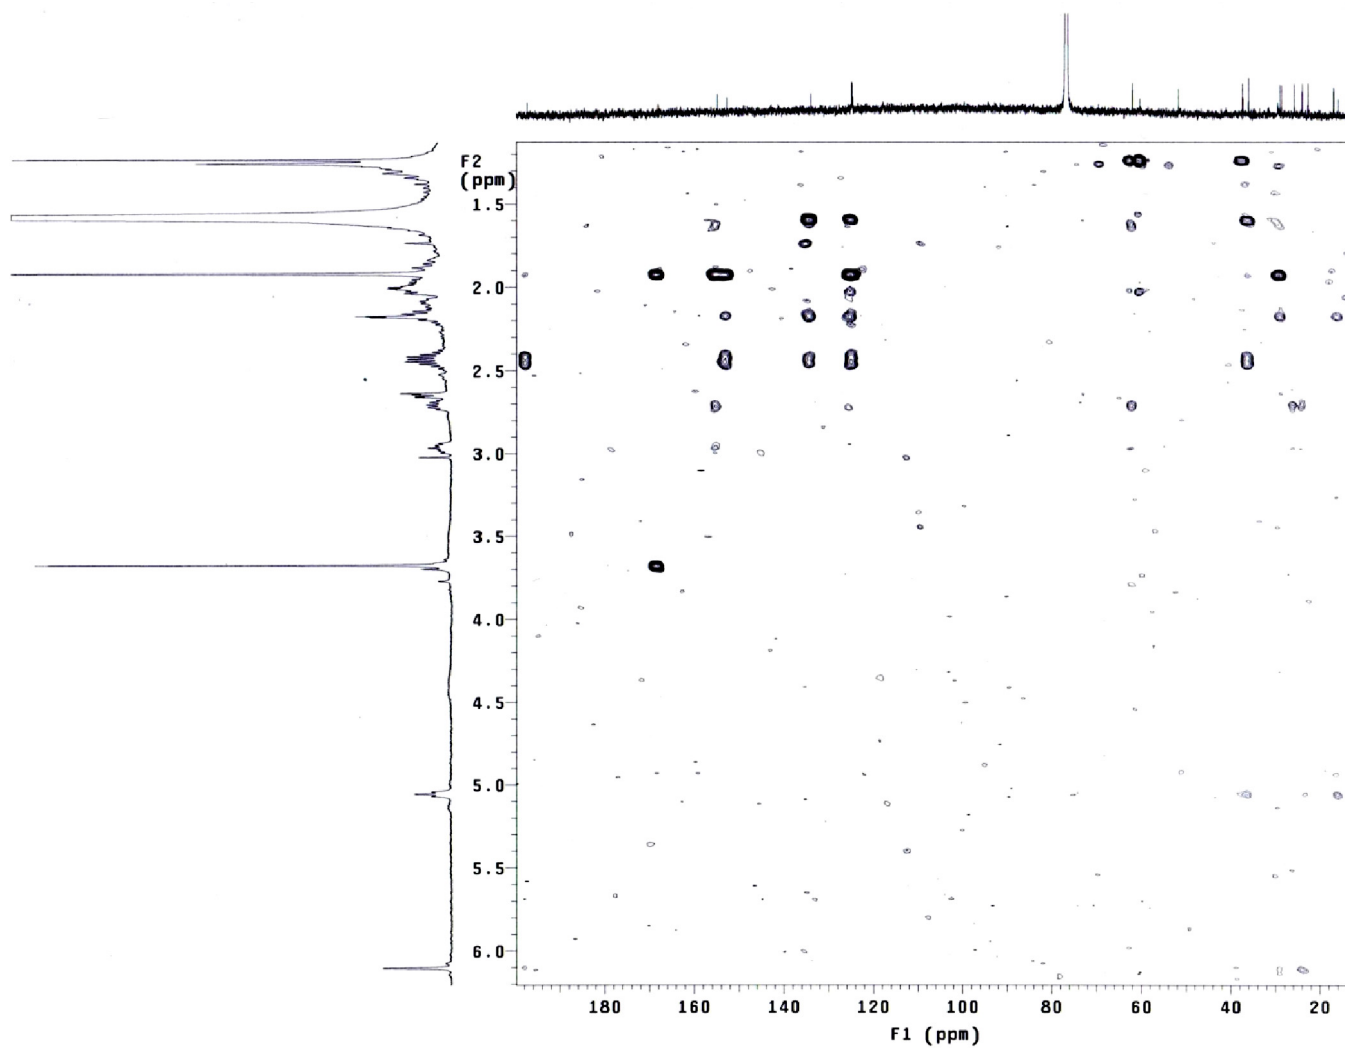

Figure S46. HMBC spectrum of **6** in CDCl<sub>3</sub>



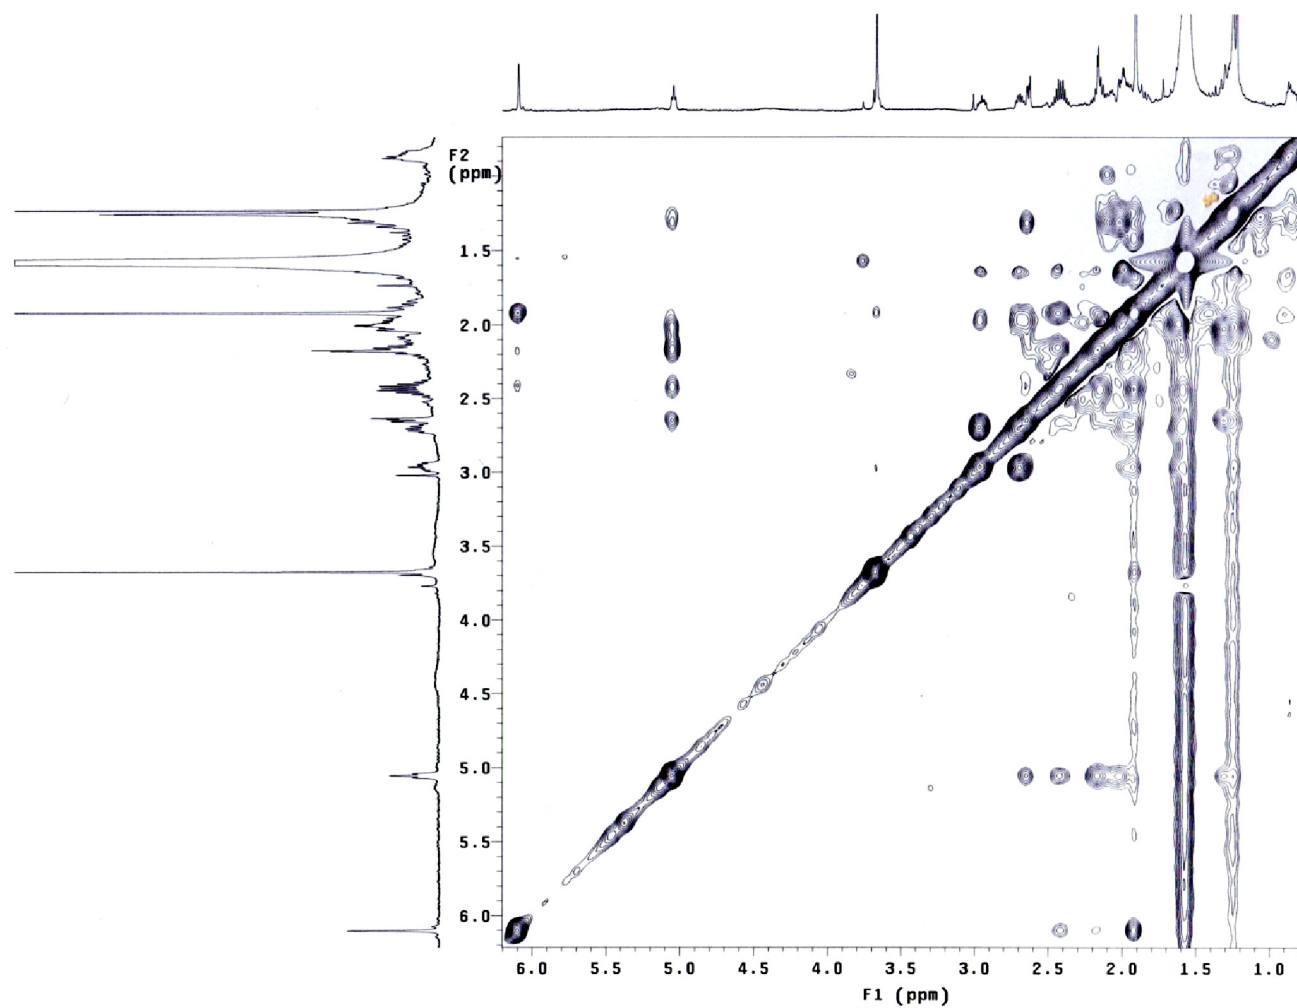

**Figure S47.** NOESY spectrum of **6** in CDCl<sub>3</sub>
